# Supplementary material for: Reactive deep eutectic solvents for EDC-mediated amide synthesis
Source: Royal Society of Chemistry journal article supplement (doi:10.1039/d3ob01673k), 2023-12-21
Supplement: d3ob01673k1.pdf [file d3ob01673k1.pdf]

## Supporting Information

### Reactive Deep Eutectic Solvents for EDC-mediated Amide Synthesis

Debora Procopio, Carlo Siciliano and Maria Luisa Di Gioia\*

Dipartimento di Scienze Farmaceutiche, Università della Calabria, Edificio Polifunzionale, I-87036 Arcavacata di Rende (CS), Italy  
Email Address: [ml.digioia@unical.it](mailto:ml.digioia@unical.it)

|    |                                                         |    |
|----|---------------------------------------------------------|----|
| 1. | <i>General information</i> .....                        | 2  |
| 2. | <i>General procedure: amide synthesis in RDES</i> ..... | 2  |
| 3. | <i>Characterization data of products</i> .....          | 3  |
| 4. | <i>References</i> .....                                 | 10 |
| 5. | <i>NMR spectra of the products</i> .....                | 12 |
| 6. | <i>E-Factor and PMI calculation</i> .....               | 41 |

## 1. General information

All starting materials were purchased from Aldrich (Merck) and used without further purification unless stated otherwise. Thin layer chromatography (TLC) was carried out on Schleicher&Schuell F1400/LS 254 plates coated with a 0.2 mm layer of silica gel; detection by UV254 light. Mass spectra (EI) were obtained at 70 eV on a Shimadzu QP- 5000 spectrometer, giving fragment ions in  $m/z$  with relative intensities (%) in parentheses.  $^1\text{H}$  NMR (300 MHz) spectra were recorded on Bruker AC-300 NMR spectrometers respectively in proton coupled mode.  $^{13}\text{C}$  NMR (75.5 MHz) spectra were recorded on Bruker AC-300 NMR spectrometer respectively in proton decoupled mode at 20 °C. Chemical shifts are given in  $\delta$  (parts per million) and coupling constants ( $J$ ) in Hertz. HPLC analysis were performed to determine the ee % value (DIACEL Chiralcel OD-H, n-hexane:2-propanol = 90:10 (1 mL/min),  $t_r$  = 13.4 min (R) and  $t_r$  = 18.1 min (S), 99 % ee, S-enantiomer).

## 2. General procedure: amide synthesis in RDES

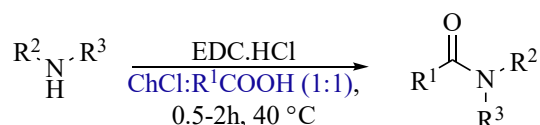

The different RDESs were prepared by mixing choline chloride and the carboxylic acid (benzoic, phenyl acetic or 4-hydroxyphenylacetic acid) in a round-bottom flask under inert atmosphere in a 1:1 molar ratio. The resulting mixture was magnetically stirred at 60-80 °C, until a clear liquid was observed. The obtained DESs were directly used without further purification. In a typical procedure, 1mmol of the coupling reagent was added to a ChCl: carboxylic acid (1:1)-based RDES. After stirring at 50°C for 10-15 minutes, the amine was added in equimolar ratio and the resulting mixture was vigorously stirred at the given temperature for an additional time (30-60 min). The progress of the reaction was monitored by TLC and GC/MS analysis. Upon completion, 2 mL of  $\text{H}_2\text{O}$  were added. The resulting aqueous suspension was then extracted with ethyl acetate ( $3 \times 2$  mL). The organic phases were dried over sodium sulphate, followed by evaporation under reduced pressure to give the corresponding amides. The reaction conversions were determined by GC/MS analysis. Spectral data were in accordance with the literature (See ESI).

### 3. Characterization data of products

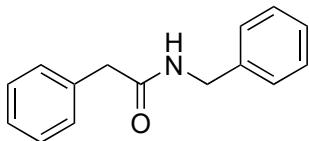

**N-Benzyl-2-phenylacetamide (3a)** White solid, yield 96%; <sup>1</sup>H NMR (300 MHz, CDCl<sub>3</sub>) δ 7.40 – 7.18 (m, 10H), 5.86 (brs, 1H), 4.42 (d, J = 5.8 Hz, 2H), 3.64 (s, 2H) ppm; <sup>13</sup>C NMR (75 MHz, CDCl<sub>3</sub>) 171.0, 138.0, 134.6, 129.4, 129.0, 128.6, 127.4, 126.5, 43.7, 43.5 ppm. **EIMS m/z (%):** 225 (M<sup>+</sup>, 30), 91 (100), 77 (5), 65 (15)

The characterization data of the compound **3a** matched previous reports<sup>S1</sup>.

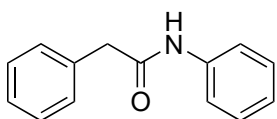

**N,2-Diphenylacetamide (3b)** White solid, yield 93%; <sup>1</sup>H NMR (300 MHz, CDCl<sub>3</sub>) δ 7.82 (s, 1H), 7.50 – 7.02 (m, 10H), 3.67 (d, J = 6.7 Hz, 2H) ppm. <sup>13</sup>C NMR (75 MHz, CDCl<sub>3</sub>) 169.6, 137.9, 134.7, 129.7, 129.3, 129.1, 128.9, 127.7, 127.3, 120.4, 44.6 ppm. **EIMS m/z (%):** 211 (M<sup>+</sup>, 80%), 119 (1), 93 (100), 77 (14), 65 (36)

The characterization data of the compound **3b** matched previous reports<sup>S2</sup>.

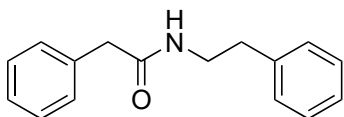

**N-Phenethyl-2-phenylacetamide (3c)** White solid, yield 97%; <sup>1</sup>H NMR (300 MHz, CDCl<sub>3</sub>) δ 7.40 – 7.09 (m, 8H), 7.09 – 6.87 (m, 2H), 5.56 (s, 1H), 3.49 (s, 2H), 3.41 (q, J = 6.5 Hz, 2H), 2.70 (q, J = 6.9 Hz, 2H) ppm. <sup>13</sup>C NMR (75 MHz, CDCl<sub>3</sub>) 171.0, 138.7, 134.8, 130.3, 129.5, 128.7, 127.9, 127.1, 126.4, 43.9, 40.7, 35.5 ppm. **EIMS m/z (%):** 239 (M<sup>+</sup>, 54), 148 (13), 120 (9), 104 (69), 91 (100), 77 (11), 65 (23)

The characterization data of the compound **3c** matched previous reports<sup>S3</sup>.

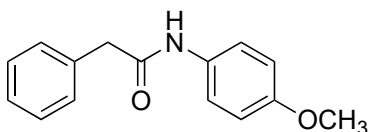

**N-(4-Methoxyphenyl)-2-phenylacetamide (3d)** White solid, yield 88%; <sup>1</sup>H NMR (300 MHz, CDCl<sub>3</sub>) δ 7.48 – 7.21 (m, 7H), 7.04 (s, 1H), 6.90 – 6.71 (m, 2H), 3.79 (s, 3H), 3.75 (s, 2H) ppm. <sup>13</sup>C NMR (75 MHz, CDCl<sub>3</sub>) 168.9, 156.6, 134.6, 130.7, 129.2, 128.6, 127.6, 117.0, 114.9, 56.6, 44.7 ppm. **EIMS m/z (%):** 241 (M<sup>+</sup>, 82), 149 (10), 123 (100), 108 (57), 91 (50), 80 (7), 65 (16)

The characterization data of the compound **3d** matched previous reports<sup>S4</sup>.

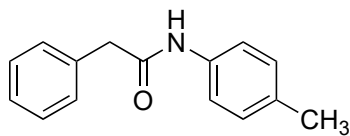

**2-Phenyl-N-(p-tolyl)acetamide (3e)** White solid, yield 91%; <sup>1</sup>H NMR (300 MHz, CDCl<sub>3</sub>) δ 7.91 (s, 1H), 7.35 (td, J = 7.4, 3.8 Hz, 7H), 7.09 (d, J = 8.0 Hz, 2H), 3.67 (s, 2H), 2.32 (s, 3H) ppm. <sup>13</sup>C NMR (75 MHz, CDCl<sub>3</sub>) 169.6, 135.2, 134.0, 129.7, 129.4, 128.8, 127.6, 127.2, 120.6, 44.8, 20.9 ppm. EIMS m/z (%): 225 (M<sup>+</sup>)

The characterization data of the compound **3e** matched previous reports<sup>S4</sup>

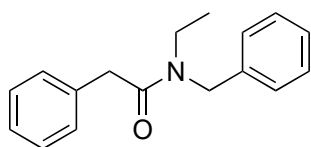

**N-Benzyl-N-ethyl-2-phenylacetamide (3f)** White solid, yield 78%; <sup>1</sup>H NMR (300 MHz, CDCl<sub>3</sub>) δ 7.41 – 7.09 (m, 10H), 4.60 & 4.46 (2 singlets, rotamers, 2H), 3.77 & 3.67 (2 singlets, rotamers, 2H), 3.41 & 3.25 (2 quadruplets, rotamers, J = 7.2 Hz, 2H), 1.17 – 0.95 (m, rotamers, 3H) ppm. <sup>13</sup>C NMR (101 MHz, CDCl<sub>3</sub>, mixture of two rotamers 1:1) δ 171.1, 170.9, 137.8, 136.9, 135.3, 129.0, 128.9, 128.7, 127.6, 127.9, 127.4, 127.1, 126.7, 50.9, 47.7, 43.4, 42.9, 42.2, 41.9, 13.6, 12.7 ppm. EIMS m/z (%): 253 (M<sup>+</sup>, 39), 162 (4), 106 (12), 91 (100), 65 (13)

The characterization data of the compound **3f** matched previous reports<sup>S2</sup>

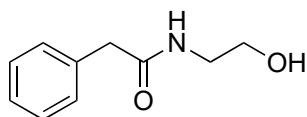

**N-(2-Hydroxyethyl)-2-phenylacetamide (3g)** White solid, yield 84%; <sup>1</sup>H NMR (300 MHz, CDCl<sub>3</sub>) δ 7.52 – 7.11 (m, 5H), 5.54 (s, 1H), 4.25 – 4.01 (m, 1H), 3.55 – 3.40 (m, 2H) ppm. <sup>13</sup>C NMR (75 MHz, CDCl<sub>3</sub>) 171.6, 135.3, 129.4, 129.0, 128.7, 127.4, 63.3, 43.7, 41.2 ppm. EIMS m/z (%): 162 (M<sup>+</sup>, 16%), 118 (28), 91 (100), 77 (5), 65 (13).

The characterization data of the compound **3g** matched previous reports<sup>S5</sup>

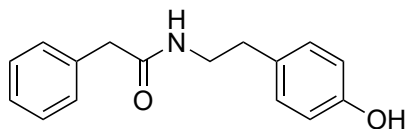

**N-(4-Hydroxyphenethyl)-2-phenylacetamide (3h):** White solid, yield 89%; <sup>1</sup>H NMR (300 MHz, CDCl<sub>3</sub>) δ 7.38 – 7.31 (m, 3H), 5.18 (d, J = 9 Hz, 2H), 6.91 (d, J = 6 Hz, 2H), 6.74 (d, 6 Hz, 2H), 5.40 (brs, 1H), 3.56 (s, 2H), 3.45 (q, 2H), 2.66 (t, J = 6 Hz, 2H) ppm. <sup>13</sup>C NMR (75 MHz, DMSO-d<sub>6</sub>) 170.4,

156.1, 136.9, 129.9, 129.5, 128.8, 128.5, 127.7, 116.5, 42.9, 40.5 ppm. **EIMS m/z (%)**: 255 ( $M^+$ , 2%), 136 (13), 120 (100), 105 (20), 91 (48), 77 (12), 65 (10), 51 (4).

The characterization data of the compound **3h** matched previous reports<sup>S6</sup>

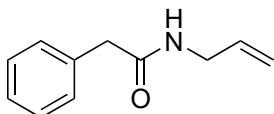

**N-Allyl-2-phenylacetamide (3i)**: White solid, yield 83%; <sup>1</sup>H NMR (300 MHz, CDCl<sub>3</sub>) δ 7.44 – 7.21 (m, 5H), 5.78 (ddt, J = 16.8, 10.8, 5.5 Hz, 1H), 5.54 (s, 1H), 5.10 – 4.99 (m, 2H), 3.86 (tt, J = 5.6, 1.6 Hz, 2H), 3.62 (s, 2H) ppm. <sup>13</sup>C NMR (75 MHz, CDCl<sub>3</sub>) 170.8, 138.6, 134.8, 134.0, 129.6, 127.5, 116.9, 43.8, 43.4 ppm. **EIMS m/z (%)**: 175 ( $M^+$ , 18%), 118 (5), 91 (100), 84 (13), 77 (2), 65 (25), 57 (24), 51 (5), 41 (43).

The characterization data of the compound **3i** matched previous reports<sup>S7</sup>

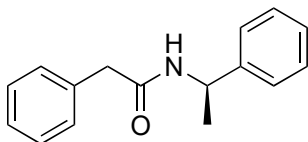

**(R)-2-Phenyl-N-(1-phenylethyl)acetamide (3j)** White solid, yield 91%; <sup>1</sup>H NMR (300 MHz, CDCl<sub>3</sub>) δ 7.48 – 7.04 (m, 10H), 5.62 (s, 1H), 5.14 (p, J = 7.1 Hz, 1H), 3.61 (s, 2H), 1.42 (dd, J = 6.9, 0.6 Hz, 3H) ppm. <sup>13</sup>C NMR (75 MHz, CDCl<sub>3</sub>) 170.0, 143.0, 135.7, 129.4, 128.6, 127.4, 127.3, 125.9, 53.8, 46.1, 21.8 ppm. **EIMS m/z (%)**: 239 ( $M^+$ , 34%), 224 (2), 120 (5), 105 (100), 91 (24), 77 (13), 65 (9), 51 (5).

The characterization data of the compound **3j** matched previous reports<sup>S8</sup>

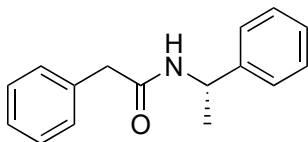

**(S)-2-phenyl-N-(1-phenylethyl)acetamide (3k)** White solid, yield 93%. <sup>1</sup>H NMR (300 MHz, CDCl<sub>3</sub>) δ 7.48 – 7.18 (m, 10H), 5.67 (s, 1H), 5.15 (p, J = 7.1 Hz, 1H), 3.60 (s, 2H), 1.42 (d, J = 6.9 Hz, 3H) ppm. <sup>13</sup>C NMR (75 MHz, CDCl<sub>3</sub>) 170.0, 143.0, 134.9, 129.3, 129.0, 128.6, 127.4, 125.9, 48.7, 43.9, 21.7 ppm. **EIMS m/z (%)**: 239 ( $M^+$ , 34%), 224 (3), 120 (7), 105 (100), 91 (21), 77 (13), 65 (10), 51 (5).

The characterization data of the compound **3k** matched previous reports<sup>S8</sup>

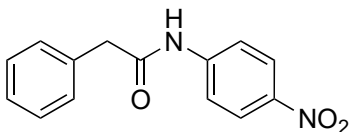

**N-(4-nitrophenyl)-2-phenylacetamide (3l)** Yellow solid, 69% yield. mixture of tautomers (85 % amidic tautomer + 15 % enamidic tautomer)  $^1\text{H NMR}$  (300 MHz, DMSO- $d_6$ )  $\delta$  10.81 (brs, 1H), 8.20 (d,  $J=9$  Hz, 2H, enamidic tautomer), 7.96 (d,  $J=9$  Hz, 9H, amidic tautomer), 7.86 (d,  $J=9$  Hz, 2H, enamidic tautomer), 7.20 (m, 10 H, amidic + enamidic tautomers), 6.71 (s, 1H), 6.63 (d,  $J=9$  Hz, 10H, amidic tautomer), 3.75 (s, 2H, amidic tautomer), 3.65 (s, 1H, enamidic tautomer) ppm.  $^{13}\text{C NMR}$  (75 MHz, DMSO- $d_6$ ) 170.7, 169.8, 156.2, 145.9, 142.7, 136.7, 136.2, 135.8, 129.5, 129.1, 126.6, 126.4, 119.7 ppm. **EIMS  $m/z$  (%)**: 256 ( $M^+$ , 22%), 226 (10), 165 (6), 118 (60), 91 (100), 65 (17), 51 (4), 39 (7).

The characterization data of the compound **3l** matched previous reports<sup>S8</sup>

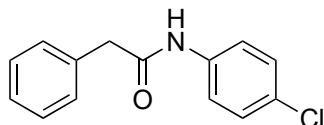

**N-(4-chlorophenyl)-2-phenylacetamide (3m)** White solid, 81% yield.  $^1\text{H NMR}$  (300 MHz,  $\text{CDCl}_3$ )  $\delta$  7.40-7.22 (m, 9H), 4.78 (brs, 1 H), 3.72 (s, 2 H) ppm.  $^{13}\text{C NMR}$  (75 MHz,  $\text{CDCl}_3$ ) 169.3, 136.2, 134.2, 129.7, 129.4, 128.9, 127.9, 122.2, 121.3, 44.6 ppm. **EIMS  $m/z$  (%)**: 245 ( $M^+$ , 60%), 247 (12), 153 (15), 127 (92), 118 (51), 91 (100), 65 (18), 51 (4), 39 (8).

The characterization data of the compound **3m** matched previous reports<sup>S8</sup>

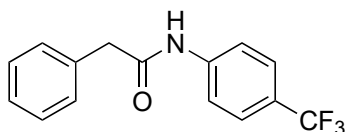

**2-phenyl-N-(4-(trifluoromethyl)phenyl)acetamide (3n)** White solid, 74% yield.  $^1\text{H NMR}$  (300 MHz,  $\text{CDCl}_3$ )  $\delta$  7.58-7.10 (m, 9H), 5.31 (brs, 1H), 3.77 (s, 2H) ppm.  $^{13}\text{C NMR}$  (75 MHz,  $\text{CDCl}_3$ ) 181.0, 140.7, 133.9, 127.6, 126.7, 125.7, 124.9, 120.6, 119.8, 44.8 ppm. **EIMS  $m/z$  (%)**: 279 ( $M^+$ , 18%), 260 (6), 161 (20), 118 (58), 91 (100), 75 (7), 65 (24), 51 (8), 39 (18).

The characterization data of the compound **3n** matched previous reports<sup>S8</sup>

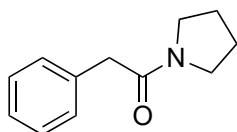

**2-phenyl-1-(pyrrolidin-1-yl)ethan-1-one (3o)** White solid, 63% yield. mixture of conformers (18:83) at 25°C  $^1\text{H NMR}$  (300 MHz,  $\text{CDCl}_3$ )  $\delta$  7.17-7.09 (m, 5H), 3.51 (s, 2H), 3.36-3.25 (m, 4H), 1.78-1.76 (m, 4H), 1.01-0.92 (m, 1H).  $^{13}\text{C NMR}$  (75 MHz,  $\text{CDCl}_3$ ) 170.0, 169.4, 135.3, 134.7, 130.0, 129.6, 128.9, 128.6, 127.9, 127.4, 126.6, 126.4, 45.7, 44.8, 43.1, 42.7, 25.9, 24.1 ppm

The characterization data of the compound **3o** matched previous reports<sup>S8</sup>

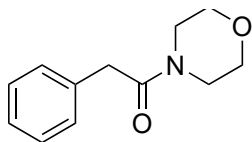

**1-morpholino-2-phenylethan-1-one (3p)** White solid, 68% yield.  $^1\text{H NMR}$  (300 MHz,  $\text{CDCl}_3$ )  $\delta$  7.76-7.07 (m, 5H), 3.57 (s, 2H), 3.47 (m, 4H), 3.30-3.26 (m, 4H) ppm.  $^{13}\text{C NMR}$  (75 MHz,  $\text{CDCl}_3$ ) 169.4, 134.6, 129.4, 129.2, 128.4, 127.7, 127.4, 126.7, 66.5, 66.3, 46.3, 45.3, 42.1, 41.6 ppm. **EIMS m/z (%)**: 205 ( $\text{M}^+$ , 40%), 190 (6), 114 (100), 91 (40), 86 (15), 70 (38), 65 (12), 56 (14), 42 (8), 29 (5).

The characterization data of the compound **3p** matched previous reports<sup>S8</sup>

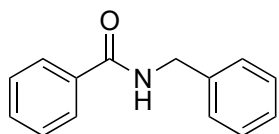

**N-Benzylbenzamide (4a)** White solid, yield 81%;  $^1\text{H NMR}$  (300 MHz,  $\text{CDCl}_3$ ):  $\delta$  7.84 – 7.68 (m, 2H), 7.52 – 7.18 (m, 8H), 6.68 (s, 1H), 4.59 (d,  $J = 5.6$  Hz, 2H) ppm.  $^{13}\text{C NMR}$  (300 MHz,  $\text{CDCl}_3$ ): 167.5, 137.8, 134.3, 131.8, 128.8, 128.1, 127.5, 126.6 ppm. **EIMS m/z (%)**: 211 ( $\text{M}^+$ , 69%), 105 (100), 91 (14), 77 (62), 65 (10), 51 (23).

The characterization data of the compound **4a** matched previous reports<sup>S1</sup>

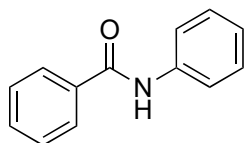

**N-Phenylbenzamide (4b)** White solid, yield 76%;  $^1\text{H NMR}$  (400 MHz,  $\text{CDCl}_3$ )  $\delta$  8.07 (s, 1H), 7.91 – 7.80 (m, 2H), 7.53 (t,  $J = 7.7$  Hz, 3H), 7.45 (t,  $J = 7.2$  Hz, 2H), 7.16 (d,  $J = 8.0$  Hz, 2H), 2.35 (s, 3H) ppm.  $^{13}\text{C NMR}$  (300 MHz,  $\text{CDCl}_3$ )  $\delta$  165.85, 137.94, 135.00, 131.85, 129.11, 128.79, 127.05, 124.60, 120.28 ppm. **EIMS m/z (%)**: 197 ( $\text{M}^+$ , 39), 105 (100), 77 (63).

The characterization data of the compound **4b** matched previous reports<sup>S3</sup>

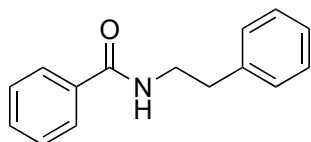

**N-Phenethylbenzamide (4c)** White solid, yield 83%;  $^1\text{H NMR}$  (300 MHz,  $\text{CDCl}_3$ )  $\delta$  7.69 (d,  $J = 7.5$  Hz, 2H), 7.44 (t,  $J = 7.3$  Hz, 1H), 7.37 (d,  $J = 7.3$  Hz, 2H), 7.28 (d,  $J = 7.1$  Hz, 2H), 7.21 (d,  $J = 15.9$  Hz, 3H), 6.51 (t,  $J = 6.2$  Hz, 1H), 3.66 (q,  $J = 6.6$  Hz, 2H), 2.89 (t,  $J = 7.0$  Hz, 2H) ppm.  $^{13}\text{C NMR}$  (75 MHz,

CDCl<sub>3</sub>):  $\delta$  167.6, 138.9, 134.6, 131.2, 128.9, 128.8, 127.9, 127.7, 126.5 ppm. **EIMS m/z (%)**: 225 (M<sup>+</sup>, 41%), 134 (15), 105 (100), 91 (7), 77 (46), 65 (5), 51(12).

The characterization data of the compound **4c** matched previous reports<sup>S1</sup>

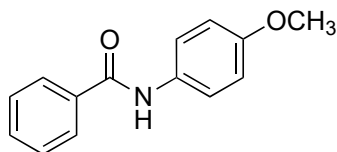

**N-(4-Methoxyphenyl)benzamide (4d)** White solid, yield 74%; **<sup>1</sup>H NMR** (300 MHz, CDCl<sub>3</sub>)  $\delta$  7.82 (d, J = 7.4 Hz, 2H), 7.73 (s, 1H), 7.47 (dd, J = 16.7, 8.0 Hz, 5H), 6.96 – 6.76 (m, 2H), 3.77 (d, J = 2.3 Hz, 3H) ppm. **<sup>13</sup>C NMR** (75 MHz, CDCl<sub>3</sub>):  $\delta$  165.6, 158.6, 135.0, 131.5, 128.6, 127.4, 122.5, 121.9, 114.3, 55.9 ppm. **EIMS m/z (%)**: 227 (M<sup>+</sup>, 60%), 105 (100), 77 (53), 65 (1), 51 (10).

The characterization data of the compound **4d** matched previous reports<sup>S2</sup>

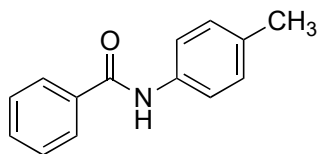

**N-(p-Tolyl)benzamide (4e)** White solid, yield 88%; **<sup>1</sup>H NMR** (400 MHz, CDCl<sub>3</sub>)  $\delta$  8.07 (s, 1H), 7.91 – 7.80 (m, 2H), 7.53 (t, J = 7.7 Hz, 3H), 7.45 (t, J = 7.2 Hz, 2H), 7.16 (d, J = 8.0 Hz, 2H), 2.35 (s, 3H) ppm. **<sup>13</sup>C NMR** (300 MHz, CDCl<sub>3</sub>)  $\delta$  165.89, 135.41, 135.05, 134.47, 134.22, 131.70, 129.55, 129.04, 128.70, 128.16, 127.09, 120.48, 29.73, 20.95. **MS** (70 eV, EI): m/z (%): 211 (M<sup>+</sup>, 41), 105 (100), 77 (45) ppm. **EIMS m/z (%)**: 211 (M<sup>+</sup>, 44%), 105 (100), 77 (57), 65 (1), 51 (13).

The characterization data of the compound **4e** matched previous reports<sup>S1</sup>

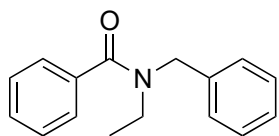

**N-Benzyl-N-ethylbenzamide (4f)** White solid, yield 56%; **<sup>1</sup>H NMR** (300 MHz, CDCl<sub>3</sub>)  $\delta$  7.32 (ddt, J = 26.3, 12.6, 5.9 Hz, 20H), 4.87 – 4.24 (2 singlets, rotamers 2H), 3.76 – 3.65 & 3.26 & 3.05 (2 multiplets, rotamers 2H), 1.21 – 1.00 (m, rotamers. 3H) ppm. **EIMS m/z (%)**: 329 (M<sup>+</sup>, 41%), 105 (100), 91 (16), 77 (40).

The characterization data of the compound **4f** matched previous reports<sup>S9</sup>

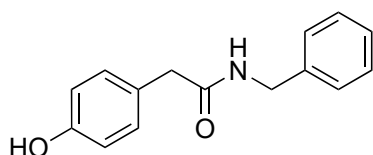



**N-Benzyl-2-(4-hydroxyphenyl)acetamide (5a)** White solid, yield 80%;  $^1\text{H NMR}$  (300 MHz, DMSO- $d_6$ )  $\delta$  9.22 (s, 1H), 7.22 (d,  $J = 7.9$  Hz, 4H), 7.10 – 7.02 (m, 3H), 6.71 – 6.65 (m, 2H), 4.26 (d,  $J = 5.6$  Hz, 3H), 3.51 (d,  $J = 8.9$  Hz, 2H) ppm.  $^{13}\text{C NMR}$  (75 MHz, DMSO- $d_6$ )  $\delta$  171.0, 156.3, 140.2, 130.4, 129.6, 128.9, 128.5, 127.7, 121.8, 115.5, 42.6, 42.0 ppm. **EIMS  $m/z$  (%)**: 241 ( $M^+$ , 33%), 147 (4), 107 (100), 91 (56), 77 (22), 65 (9), 51 (6).

The characterization data of the compound **5a** matched previous reports<sup>S10</sup>

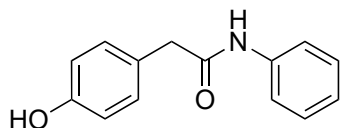

**2-(4-Hydroxyphenyl)-N-phenylacetamide (5b)** White solid, yield 74%;  $^1\text{H NMR}$  (300 MHz,  $\text{CDCl}_3$ )  $\delta$  7.38 (d,  $J = 8.2$  Hz, 2H), 7.33 – 7.18 (m, 4H), 7.19 – 7.08 (m, 2H), 6.78 (dd,  $J = 8.3, 3.8$  Hz, 2H), 3.60 (d,  $J = 11.4$  Hz, 2H) ppm.  $^{13}\text{C NMR}$  (75 MHz,  $\text{CDCl}_3$ )  $\delta$  170.0, 155.7, 138.7, 130.8, 129.8, 128.8, 124.6, 122.2, 120.1, 116.2, 43.9 ppm. **EIMS  $m/z$  (%)**: 227 ( $M^+$ , 52), 134 (43), 107 (100), 93 (67), 77 (44), 51 (13).

The characterization data of the compound **5b** matched previous reports<sup>S11</sup>

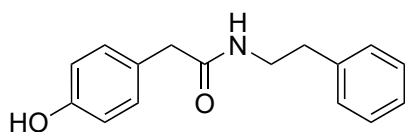

**2-(4-Hydroxyphenyl)-N-phenethylacetamide (5c)** White solid, yield 61%;  $^1\text{H NMR}$  (300 MHz,  $\text{CDCl}_3$ )  $\delta$  7.31 – 7.17 (m, 4H), 7.10 – 7.02 (m, 2H), 6.98 (d,  $J = 8.3$  Hz, 2H), 6.85 (d,  $J = 8.4$  Hz, 2H), 5.76 (d,  $J = 6.0$  Hz, 1H), 3.47 (d,  $J = 6.0$  Hz, 4H), 2.73 (t,  $J = 6.9$  Hz, 2H) ppm.  $^{13}\text{C NMR}$  (75 MHz,  $\text{CDCl}_3$ )  $\delta$  172.6, 156.2, 138.3, 131.3, 129.7, 128.6, 127.8, 126.5, 116.6, 42.6, 41.8, 35.3 ppm. **EIMS  $m/z$  (%)**: 255 ( $M^+$ , 29), 207 (3), 151 (16), 136 (14), 107 (100), 91 (15), 77 (19), 51 (5).

The characterization data of the compound **5c** matched previous reports<sup>S11</sup>

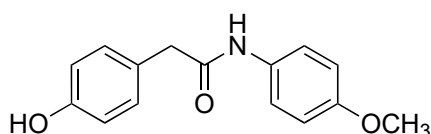

**2-(4-Hydroxyphenyl)-N-(4-methoxyphenyl)acetamide (5d)** White solid, yield 74%;  $^1\text{H NMR}$  (300 MHz, DMSO- $d_6$ )  $\delta$  10.04 (s, 1H), 9.93 (s, 2H), 9.29 (s, 3H), 7.51 (d,  $J = 8.5$  Hz, 7H), 7.17 – 6.98 (m, 13H), 6.87 (d,  $J = 8.5$  Hz, 6H), 6.74 (dd,  $J = 12.7, 8.1$  Hz, 9H), 3.98 (s, 2H), 3.81 (s, 5H), 3.71 (s, 12H), 3.60 (d,  $J = 12.4$  Hz, 5H), 3.47 (s, 7H) ppm.  $^{13}\text{C NMR}$  (75 MHz, DMSO- $d_6$ )  $\delta$  170.9, 159.1, 155.6, 132.0, 130.9, 129.6, 121.8, 116.2, 114.1, 55.7, 43.7 ppm. **EIMS  $m/z$  (%)**: 257 ( $M^+$ , 66%), 207 (3), 149 (13), 123 (100), 107 (72), 92 (7), 77 (25), 52 (10).

The characterization data of the compound **5d** matched previous reports<sup>S11</sup>

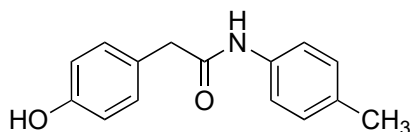

**2-(4-Hydroxyphenyl)-N-(p-tolyl)acetamide (5e)** White solid, yield 58%;  $^1\text{H NMR}$  (300 MHz, DMSO-d<sub>6</sub>)  $\delta$  9.95 (s, 1H), 9.24 (s, 1H), 7.48 (d,  $J = 8.0$  Hz, 3H), 7.21 – 6.98 (m, 6H), 6.74 (t,  $J = 10.4$  Hz, 3H), 3.49 (s, 3H), 2.24 (s, 4H) ppm.  $^{13}\text{C NMR}$  (75 MHz, DMSO-d<sub>6</sub>)  $\delta$  169.8, 156.5, 137.3, 132.4, 130.4, 129.5, 126.7, 120.7, 116.1, 42.9, 20.9 ppm. **EIMS m/z (%)**: 241 ( $\text{M}^+$ , 66%), 242 (100), 108 (54), 104 (65).

The characterization data of the compound **5e** matched previous reports<sup>S11</sup>

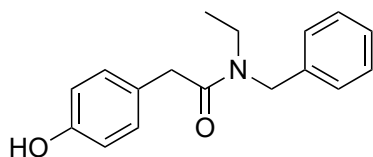

**N-Benzyl-N-ethyl-2-(4-hydroxyphenyl)acetamide (5f)** White solid; yield 54%;  $^1\text{H NMR}$  (300 MHz, DMSO)  $\delta$  9.24 (s, 1H), 7.36 – 6.59 (m, 9H), 4.54 & 4.52 (2 singlets, rotamers, 2H) 3.59 & 3.49 (2 singlets, rotamers, 2H) 3.41 (m., 2H), 0.99 (m, rotamers, 3H) ppm.  $^{13}\text{C NMR}$  (75 MHz, DMSO-d<sub>6</sub>)  $\delta$  171.1, 156.3, 138.1, 137.8, 131.1, 130.3, 128.9, 128.0, 127.8, 127.2, 126.4, 115.6, 47.5, 42.2, 40.8, 13.4, 11.2 ppm. **EIMS m/z (%)**: 269 ( $\text{M}^+$ , 33%), 162 (3), 107 (49), 91 (100), 77 (12), 51 (3).

The characterization data of the compound **5f** matched previous reports<sup>S11</sup>

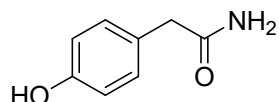

**2-(4-Hydroxyphenyl)acetamide (5g)** White solid, yield 94% ;  $^1\text{H NMR}$  (300 MHz, DMSO-d<sub>6</sub>)  $\delta$  9.22 (brs, 1H), 7.36 (brs, 1H), 7.04 (d,  $J = 6$  Hz, 2H), 6.80 (brs, 1H), 6.08 (d,  $J = 6$  Hz, 2H), 3.24 (s, 2H).  $^{13}\text{C NMR}$  (75 MHz, DMSO-d<sub>6</sub>)  $\delta$  173.9, 156.8, 130.9, 130.1, 127.6, 115.9, 43.2 ppm. **EIMS m/z (%)**: 151 ( $\text{M}^+$ , 30%), 107 (100), 77 (24), 51 (10), 44 (8), 39 (6)

#### 4. References

- S1. W.-K. Chan.; C-M Ho.; M.-K. Wong.; C.-M. Che. *J. Am. Chem. Soc.*, **2006**, *128*,14796;  
 S2. D. C. Braddock, B. C. Rowley, P. D. Lickiss, S. J. Fussell, R. Qamar, D. Pugh, H. S. Rzepa, A. J. P. White. *J. Org. Chem.*, **2023**, *88*, 9853-9869;  
 S3. A. Álvarez-Pérez, M. A. Esteruelas, S. Izquierdo, J. A. Varela, C. Saá. *Org. Lett.*, **2019**, *21*, 5346-5350;  
 S4. Y. Liu, Z.-P. Bao, X. Qi, X.-F. Wu *Org. Chem. Front.*, **2022**, *9*, 2079-2083;

- S5. Movassaghi, M.; Schmidt, M. A. *Org. Lett.*, **2005**, *7*, 2453.;
- S6. N. Gernigon, R. M. Al-Zoubi, D. Hall G. *J. Org. Chem.*, **2012**, *77*, 8386-8400
- S7. P. Ramesh, Nitin W. Fadnavis. *Chem. Let.* **2015**, *44*, 138-140
- S8. C. Kanta De, E. G. Klauber and D. Seidel, *J. Am. Chem. Soc.*, **2009**, *131*, 17060.
- S9. R. Balaboina, N. S. Thirukovela, R. Vadde, C. S. Vasam *Tetrahedron Lett.*, **2019**, *60*, 847-851
- S10. N. Arnold, D. Beattle, M. Bradly, A. Brearley, L. Brown, S. J. Charlton, R. A. Fairhurst, D. Farr, J. Fozard, J. Fullerton, M. Gosling, J. Hatto M D. Janus, D. Jones, L. Jordan, C. Lewis, J. Maas, C. McCarthy, M. Mercer, H. Oakman, N. Press, R. Profit, F. Schuerch, D. Sykes, R. J. Taylor, A. Trifilieff, A. Tuffnell. *Biorg. Med Chem. Let.*, **2014**, *24*, 4341-4347
- S11. K. V. N. S. Sriniva, B. Das. *J. Org. Chem.*, **2003**, *68*, 1165-1167

## 5. NMR spectra of the products

$^1\text{H}$  NMR: (300 MHz,  $\text{CDCl}_3$ ) of **3a**

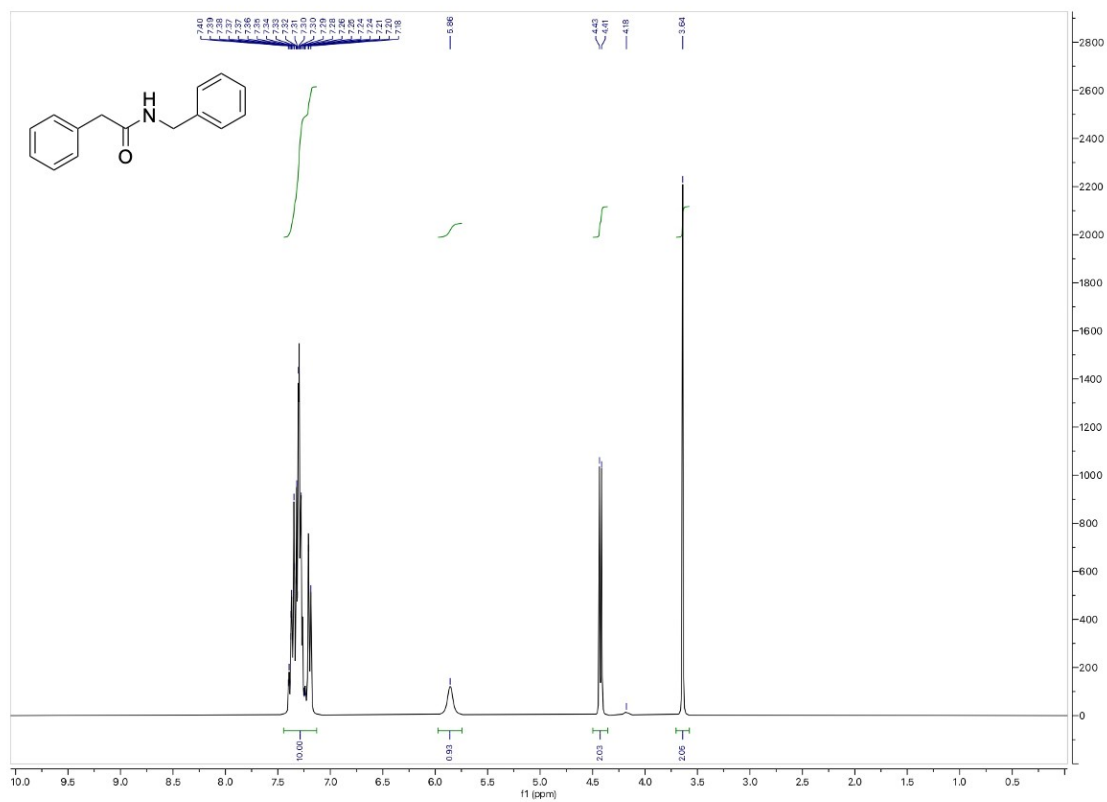

$^{13}\text{C}$  NMR: (75 MHz,  $\text{CDCl}_3$ ) of **3a**

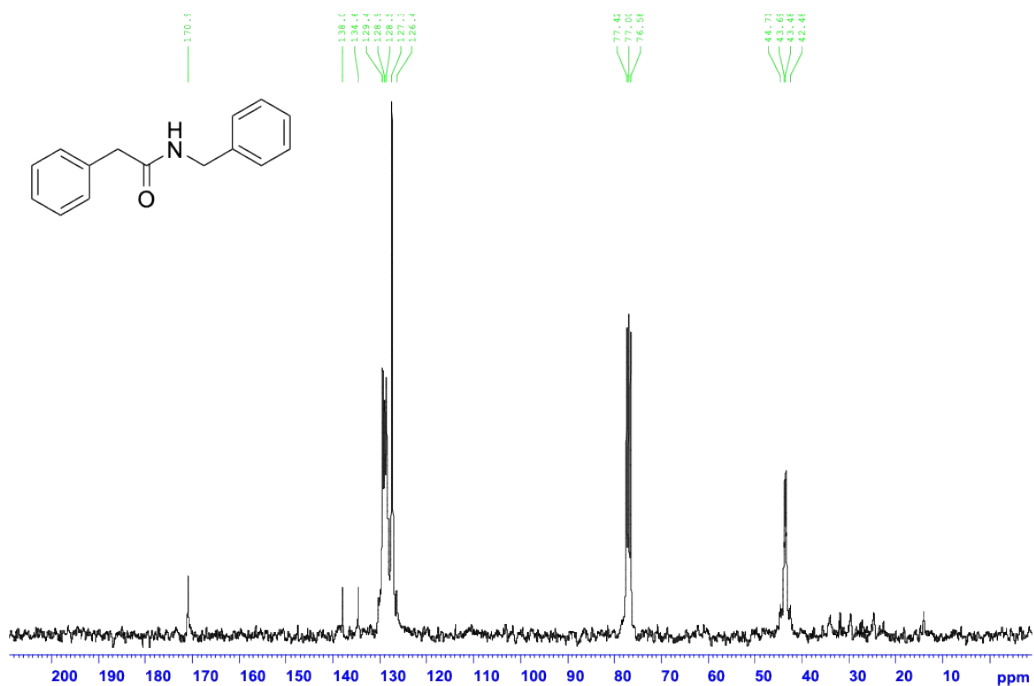

$^1\text{H}$  NMR: (300 MHz,  $\text{CDCl}_3$ ) of **3b**

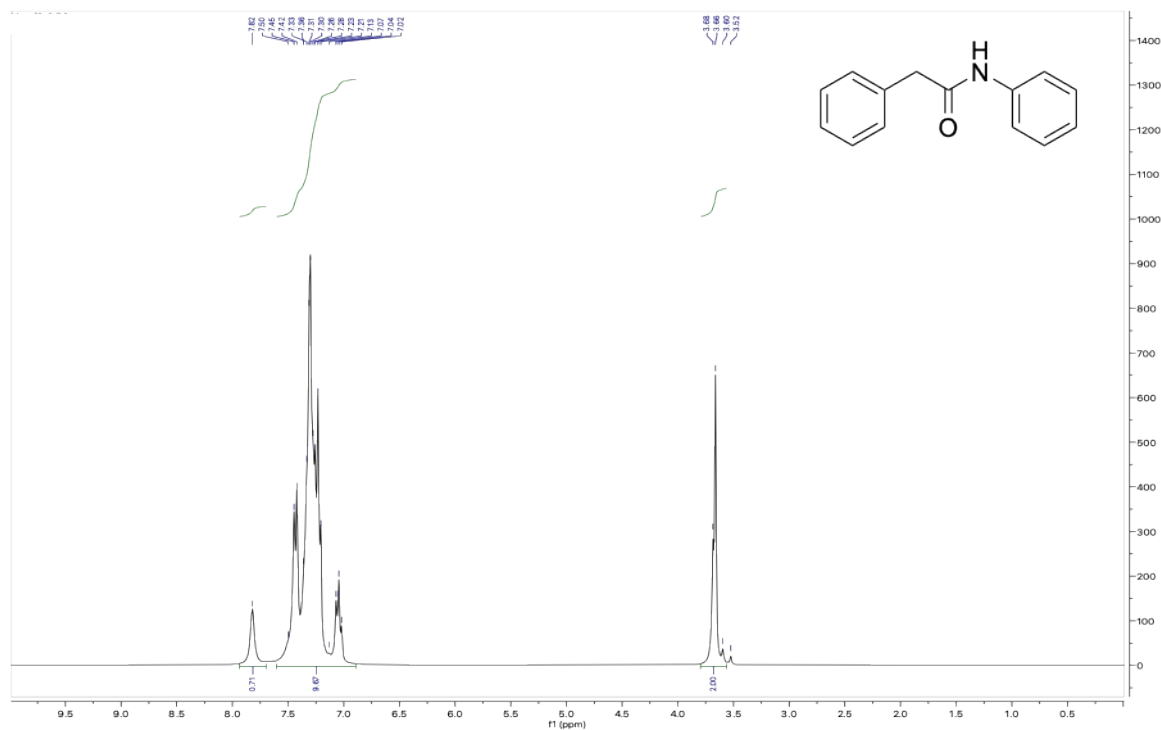

$^{13}\text{C}$  NMR: (75 MHz,  $\text{CDCl}_3$ ) of **3b**

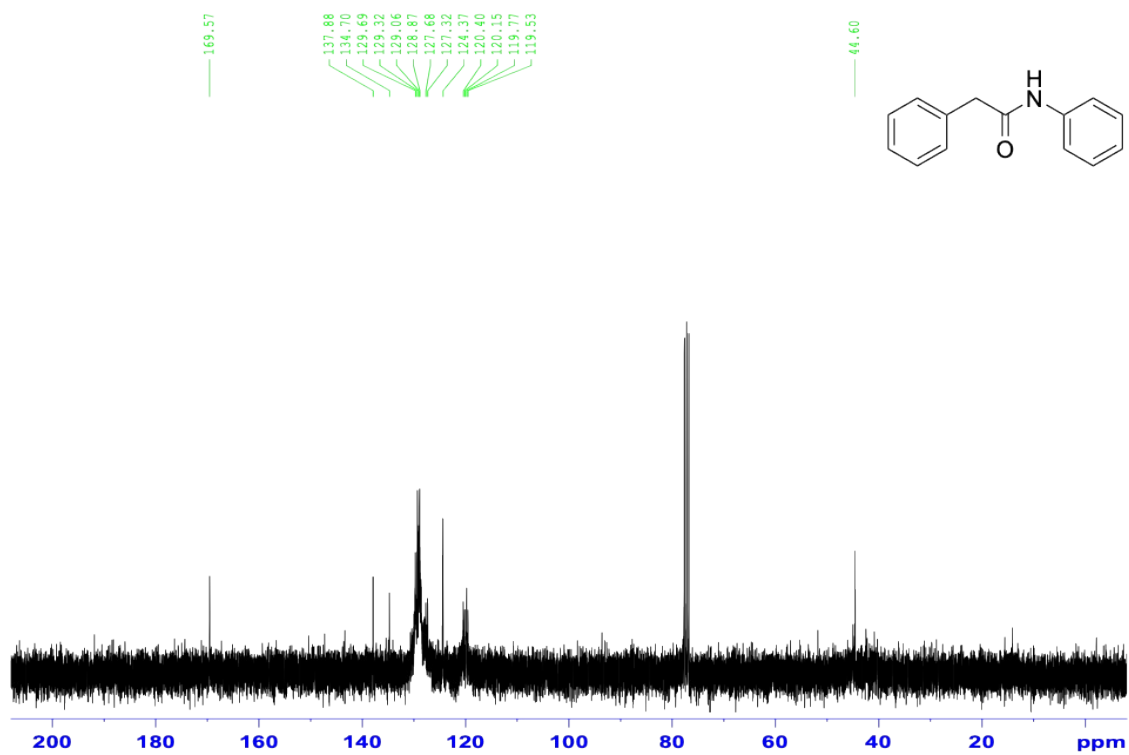

$^1\text{H}$  NMR: (300 MHz,  $\text{CDCl}_3$ ) of **3c**

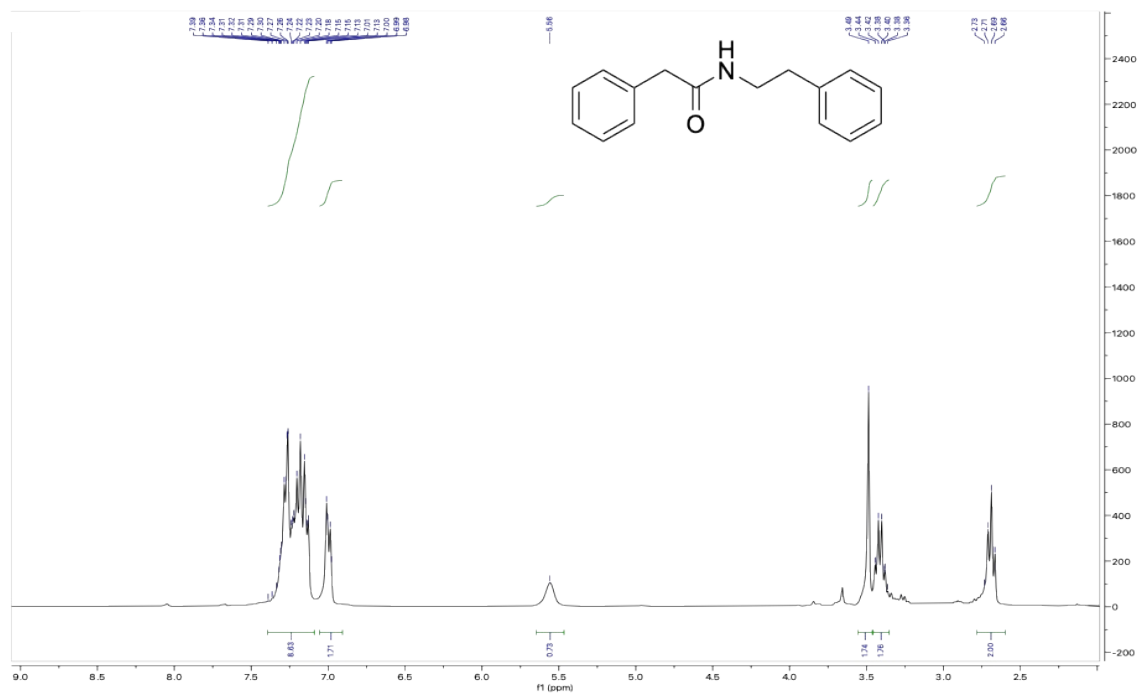

$^{13}\text{C}$  NMR: (75 MHz,  $\text{CDCl}_3$ ) of **3c**

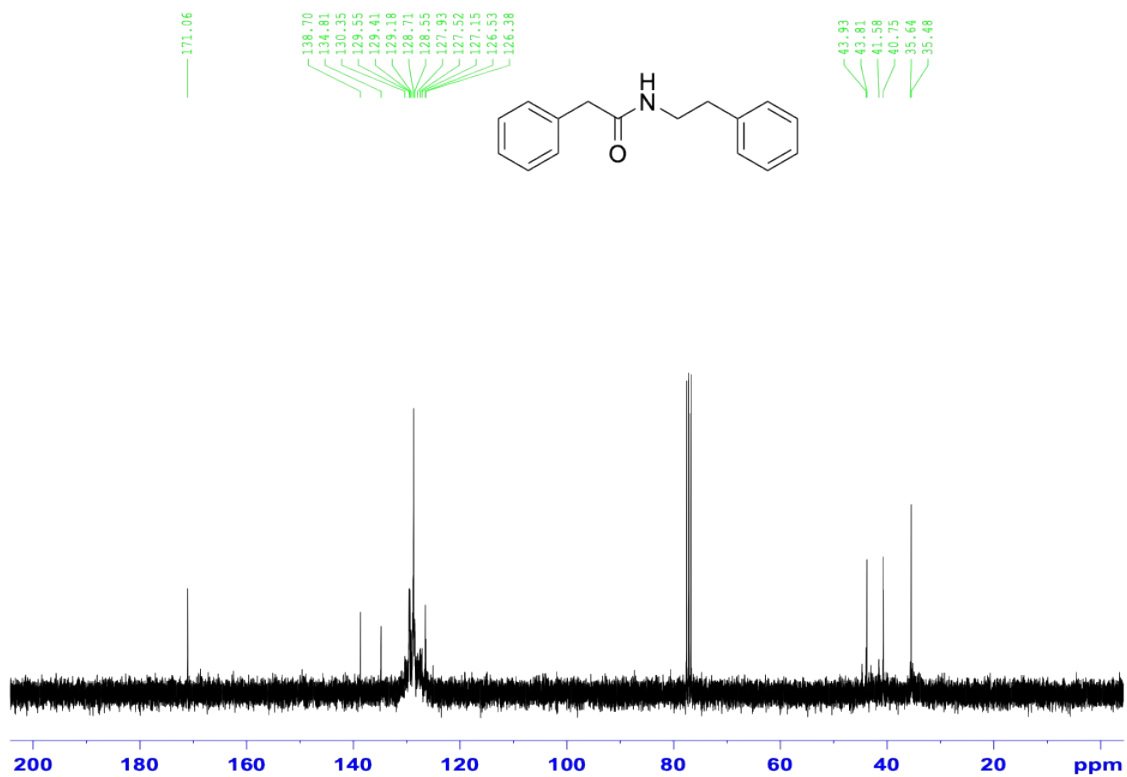

$^1\text{H}$  NMR: (300 MHz,  $\text{CDCl}_3$ ) of **3d**

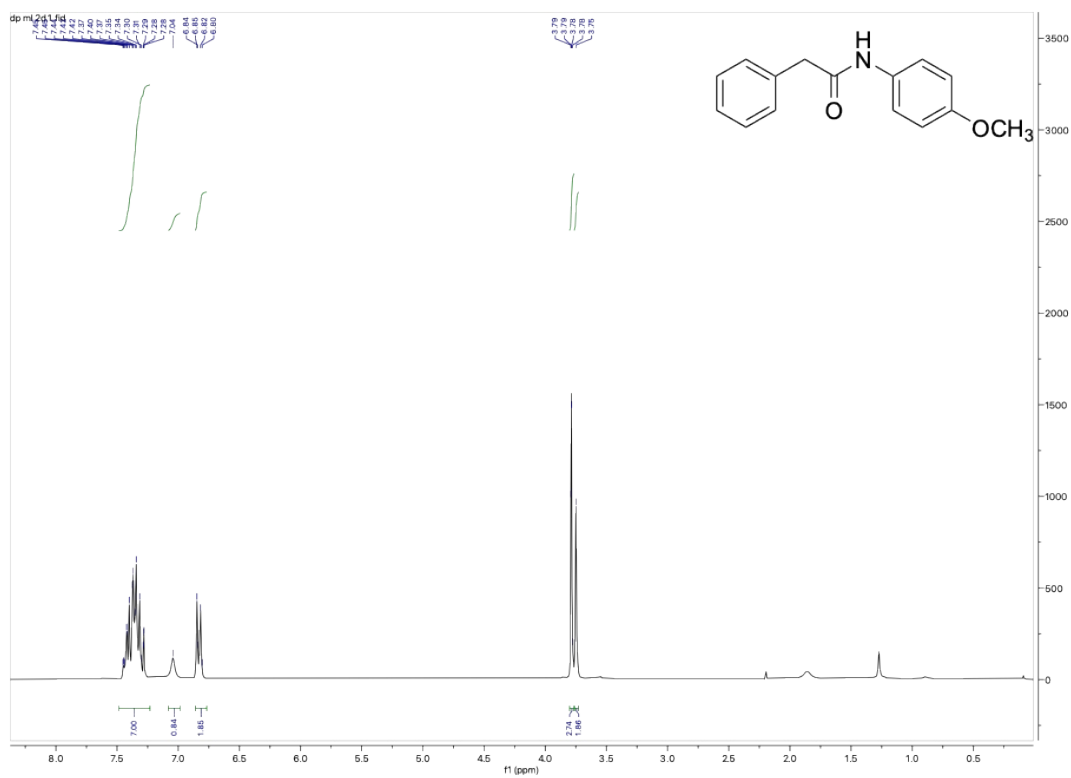

$^{13}\text{C}$  NMR: (75 MHz,  $\text{CDCl}_3$ ) of **3d**

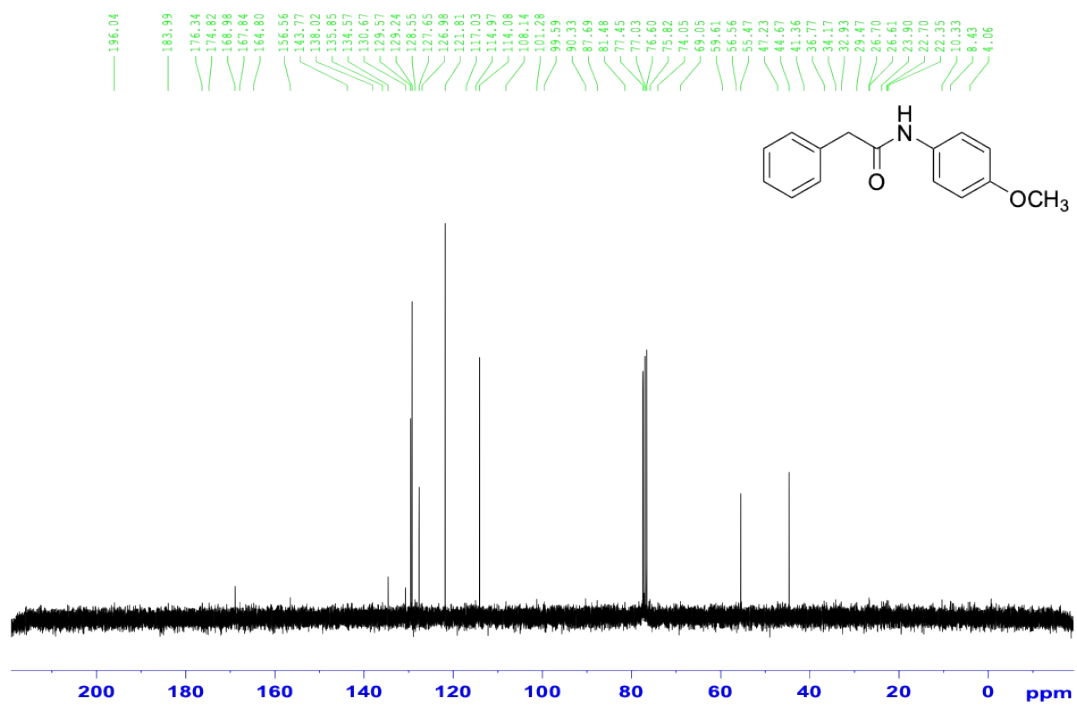

$^1\text{H}$  NMR: (300 MHz,  $\text{CDCl}_3$ ) of **3e**

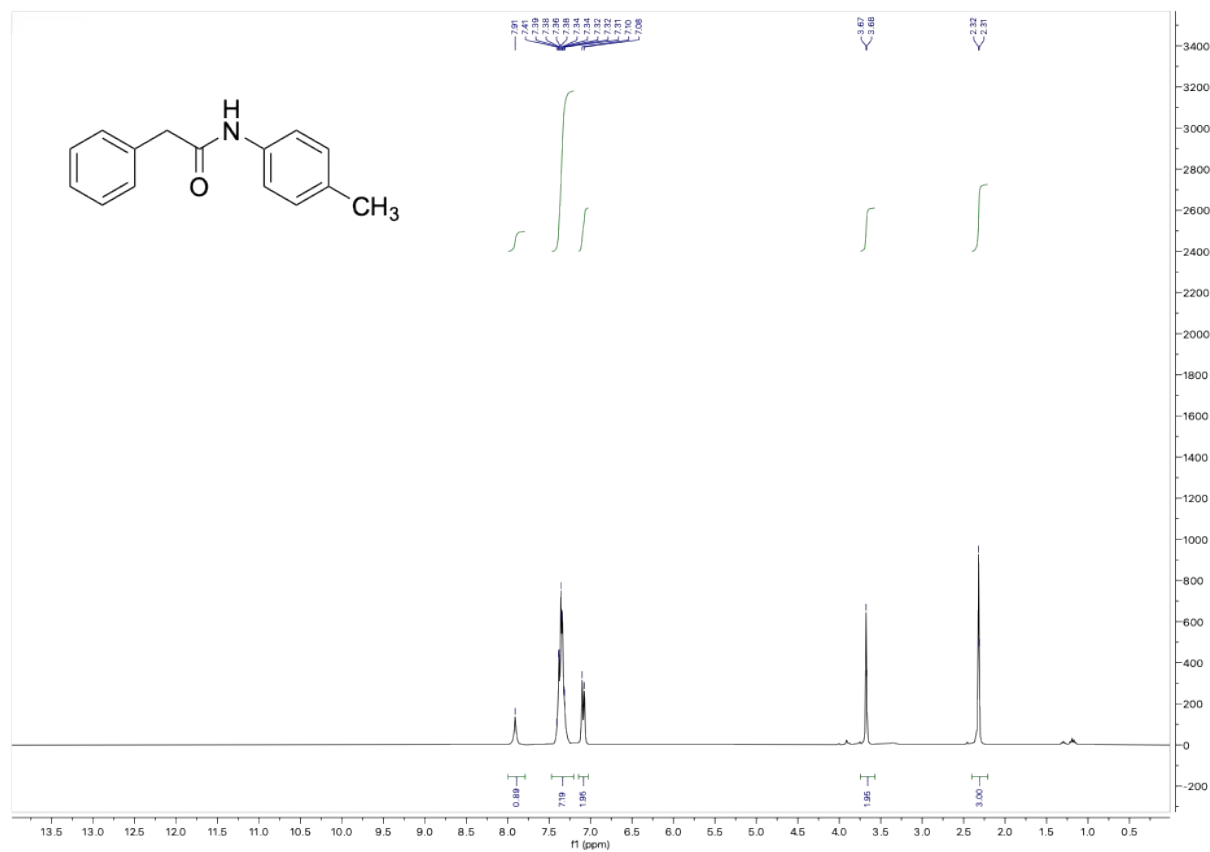

$^{13}\text{C}$  NMR: (75 MHz,  $\text{CDCl}_3$ ) of **3e**

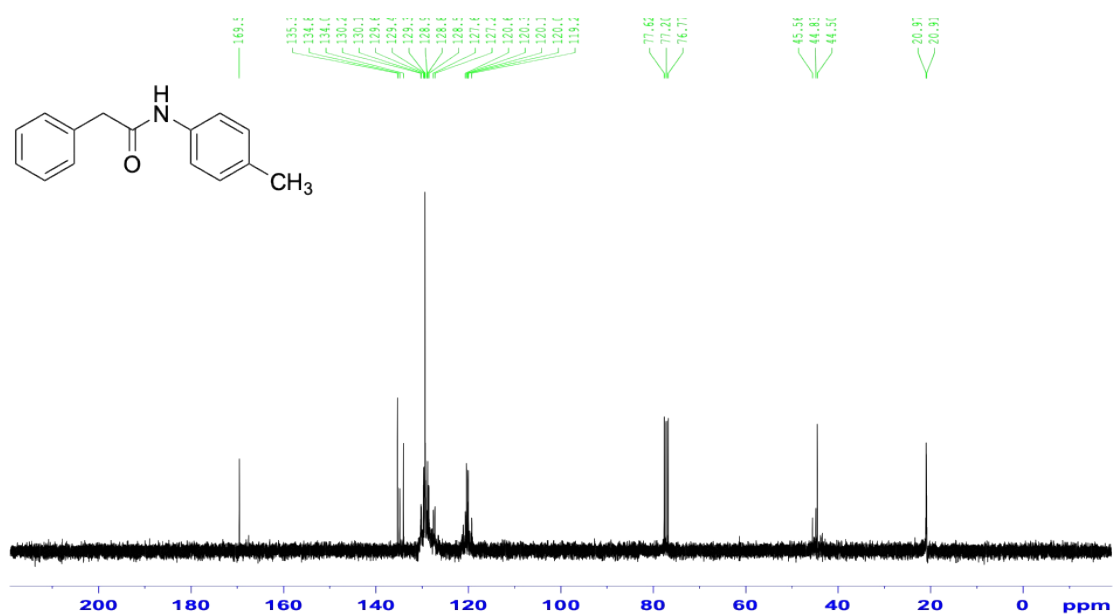



$^1\text{H}$  NMR: (300 MHz,  $\text{CDCl}_3$ ) of **3f** – mixture of two rotamers

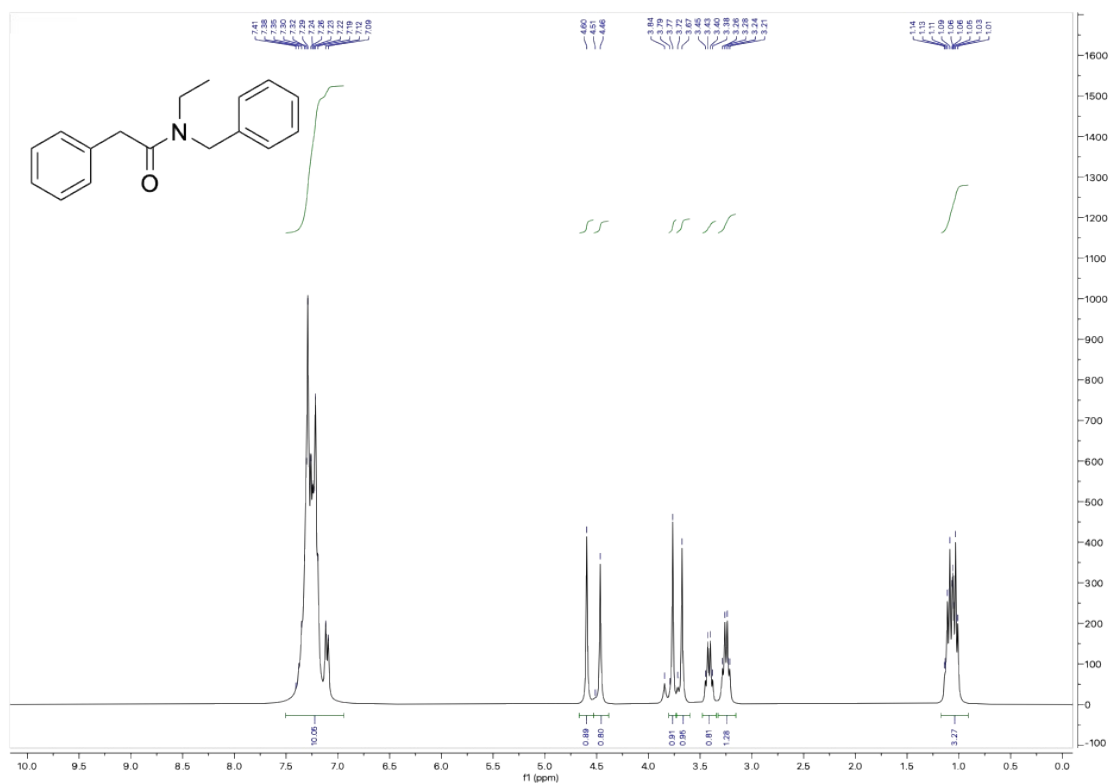

$^{13}\text{C}$  NMR: (75 MHz,  $\text{CDCl}_3$ ) of **3f** - mixture of two rotamers

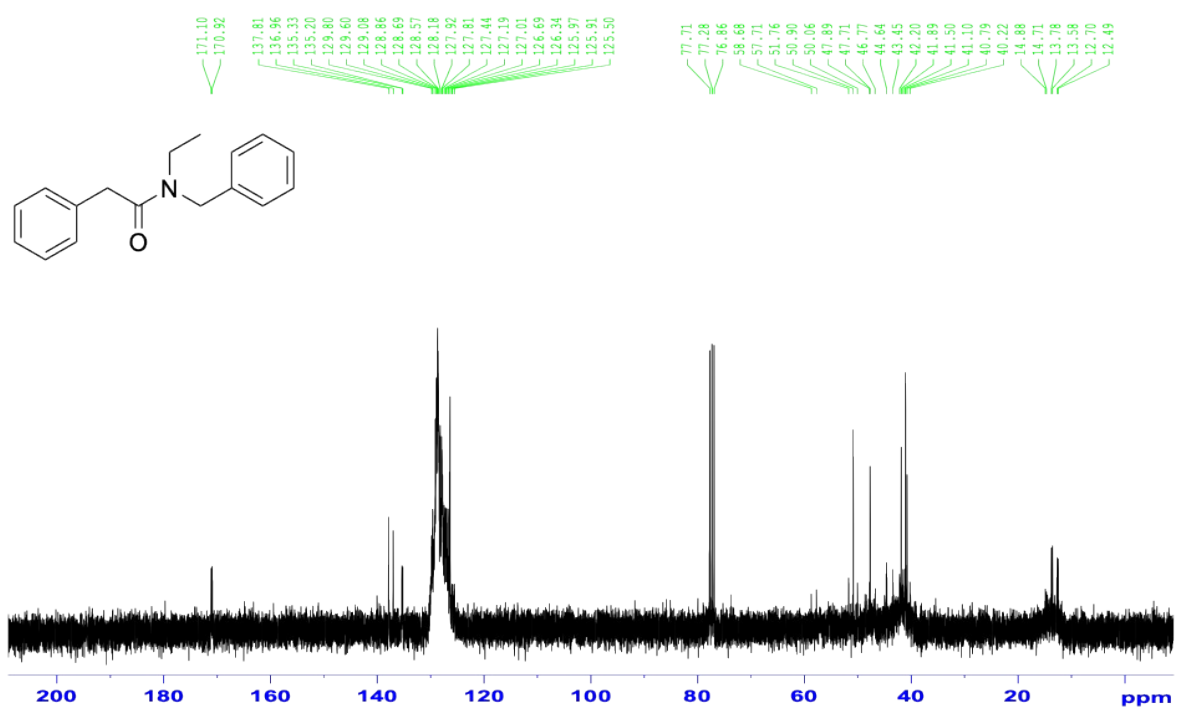

$^1\text{H}$  NMR: (300 MHz,  $\text{CDCl}_3$ ) of **3g**

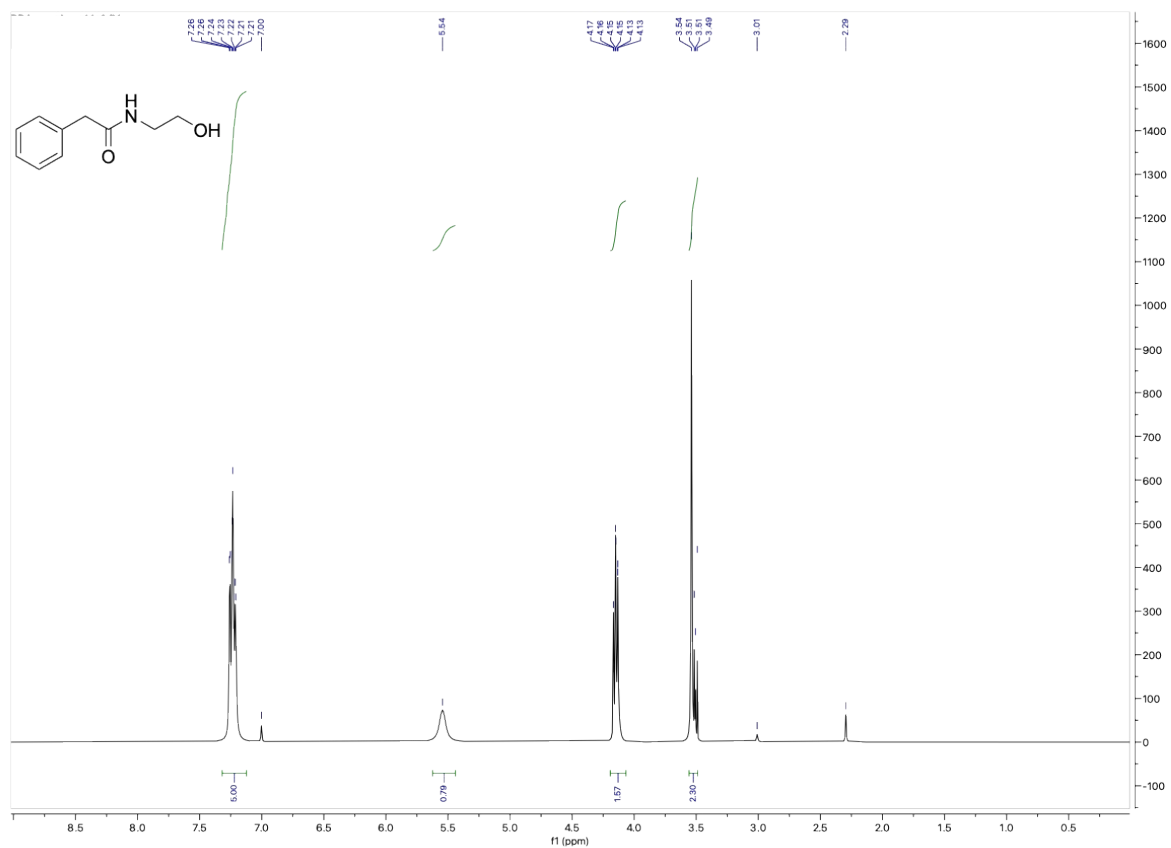

$^{13}\text{C}$  NMR: (75 MHz,  $\text{CDCl}_3$ ) of **3g**

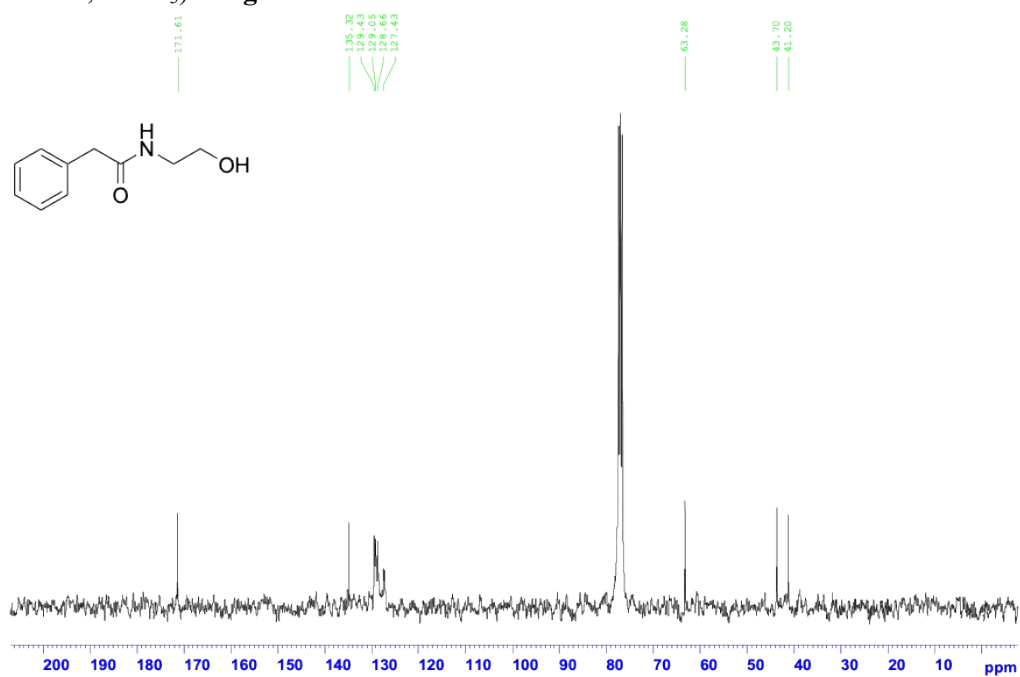

$^1\text{H}$  NMR: (300 MHz,  $\text{CDCl}_3$ ) of **3h**

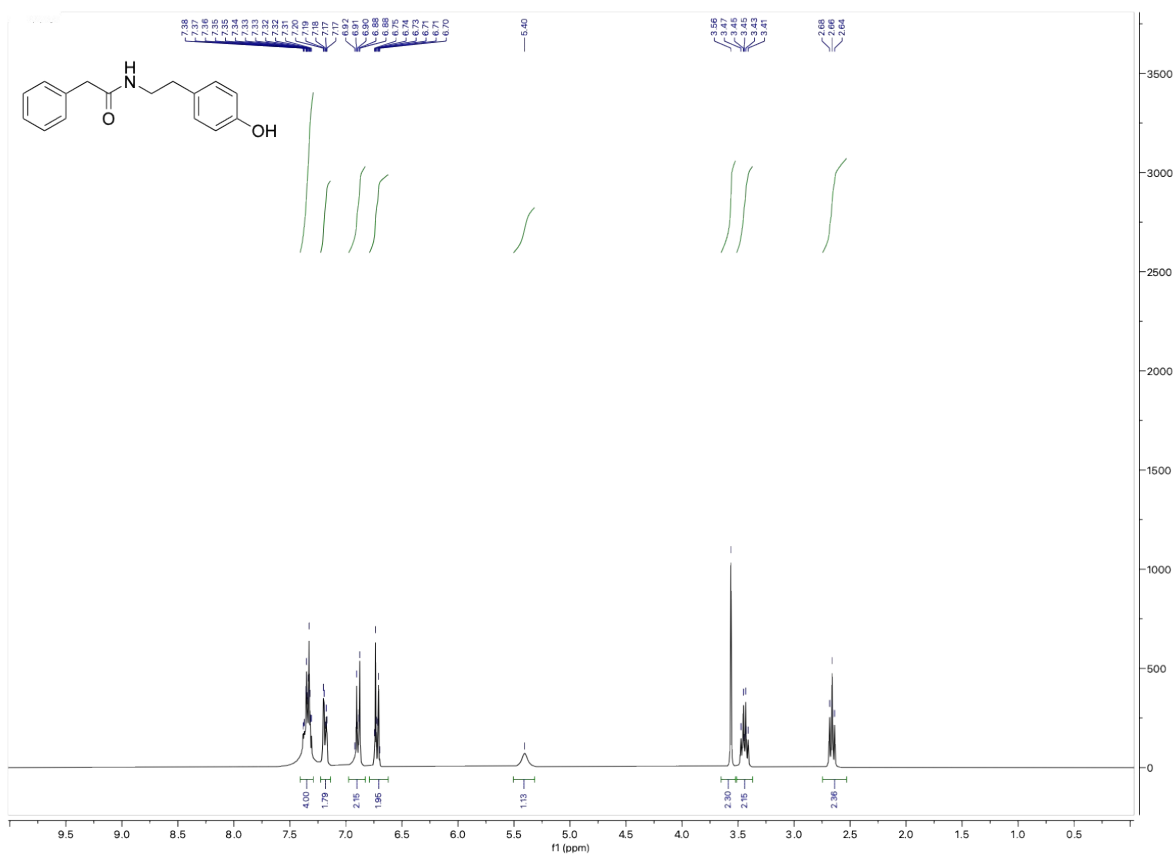

$^{13}\text{C}$  NMR: (75 MHz,  $\text{DMSO-d}_6$ ) of **3h**

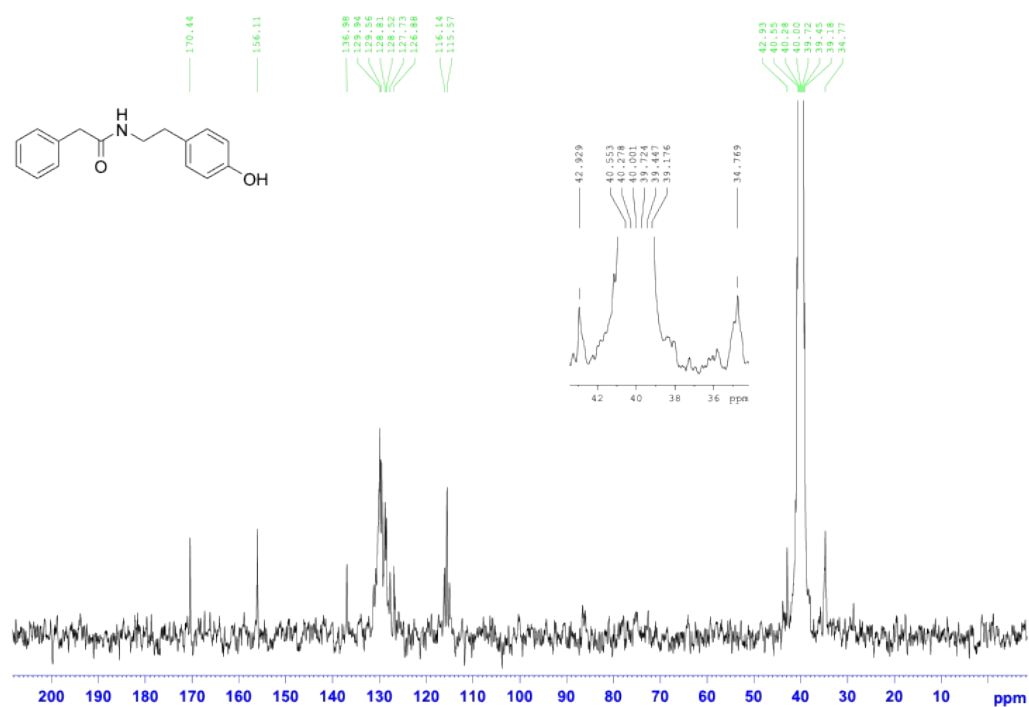

$^1\text{H}$  NMR: (300 MHz,  $\text{CDCl}_3$ ) of **3i**

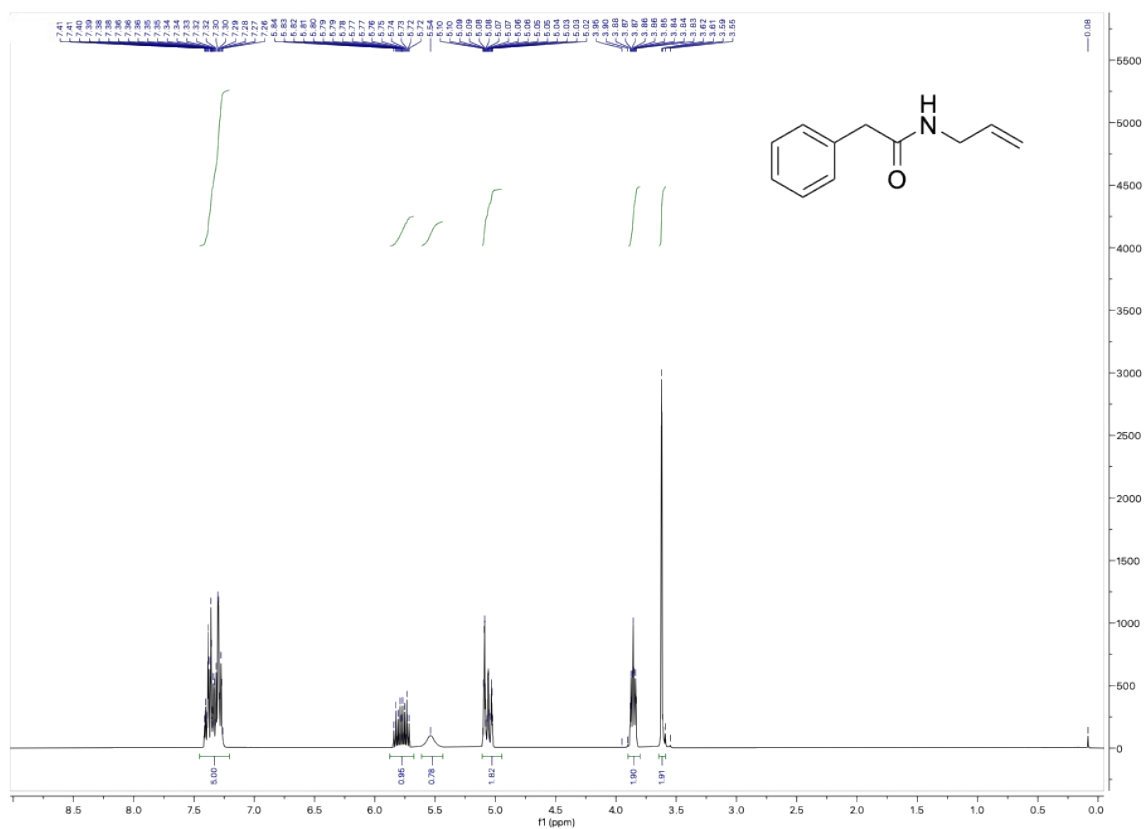

$^{13}\text{C}$  NMR: (75 MHz,  $\text{CDCl}_3$ ) of **3i**

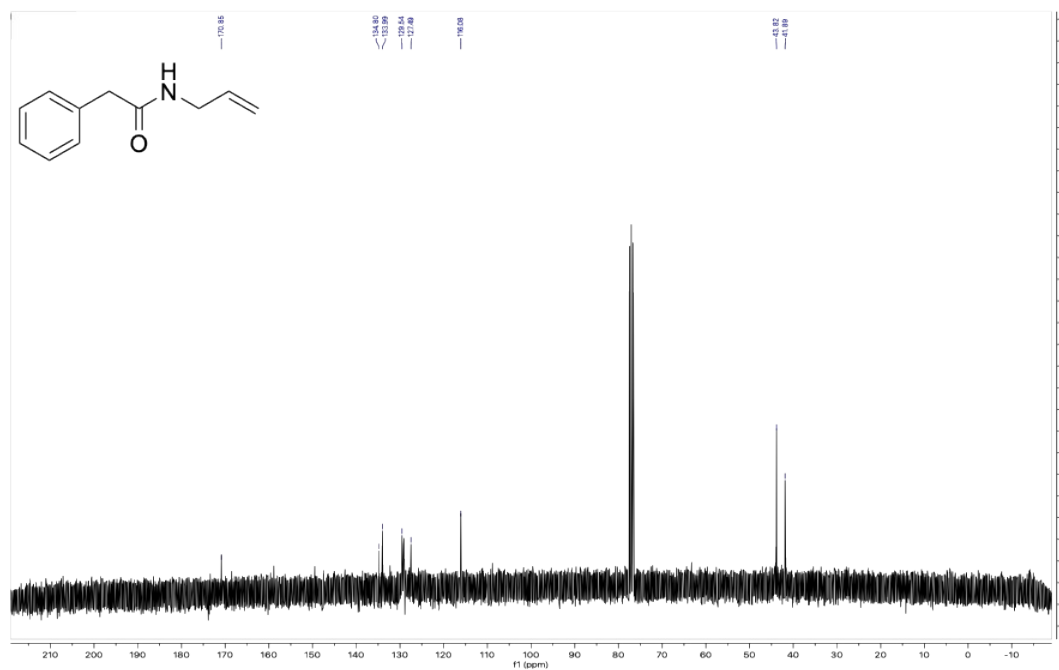

$^1\text{H}$  NMR: (300 MHz,  $\text{CDCl}_3$ ) of **3j**

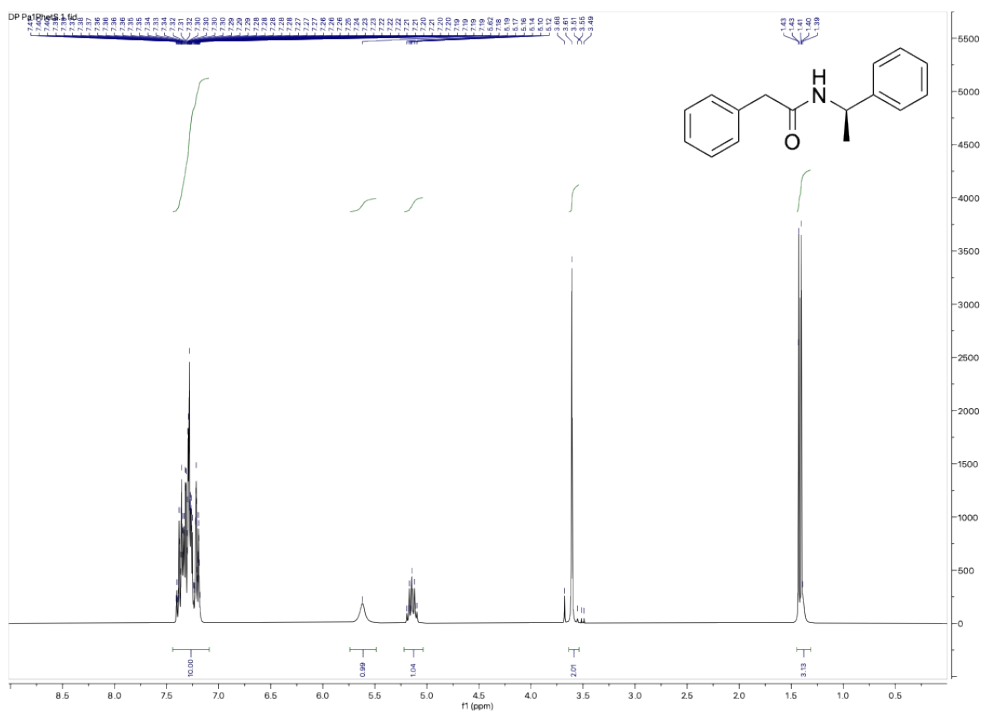

$^{13}\text{C}$  NMR: (75 MHz,  $\text{CDCl}_3$ ) of **3j**

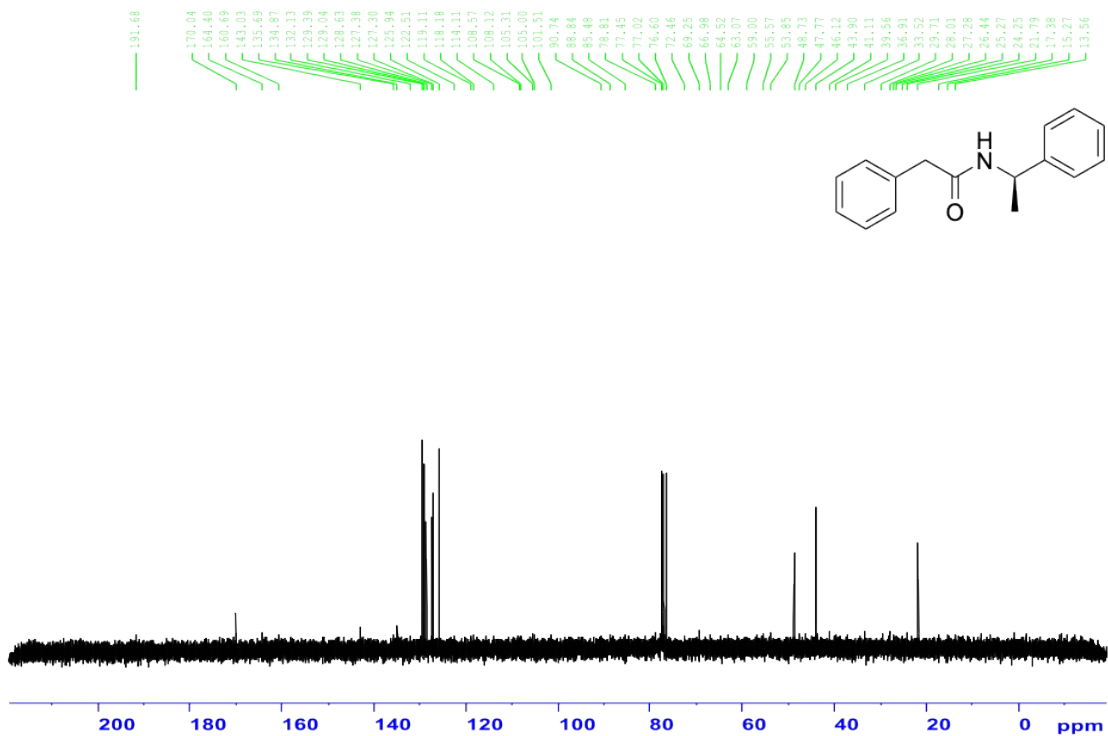



$^1\text{H}$  NMR: (300 MHz, DMSO- $d_6$ ) of **31** mixture of tautomers (85 % amidic tautomer + 15 % enamidic tautomer)

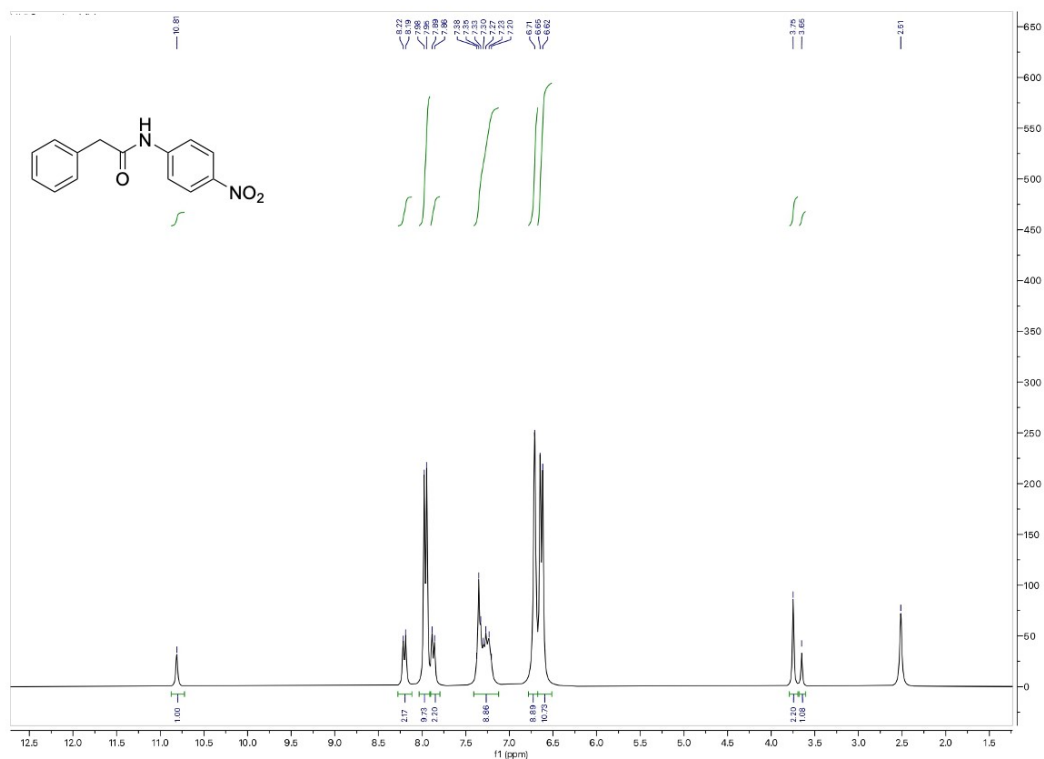

$^{13}\text{C}$  NMR: (75 MHz, DMSO- $d_6$ ) of **31** mixture of tautomers (85 % amidic tautomer + 15 % enamidic tautomer)

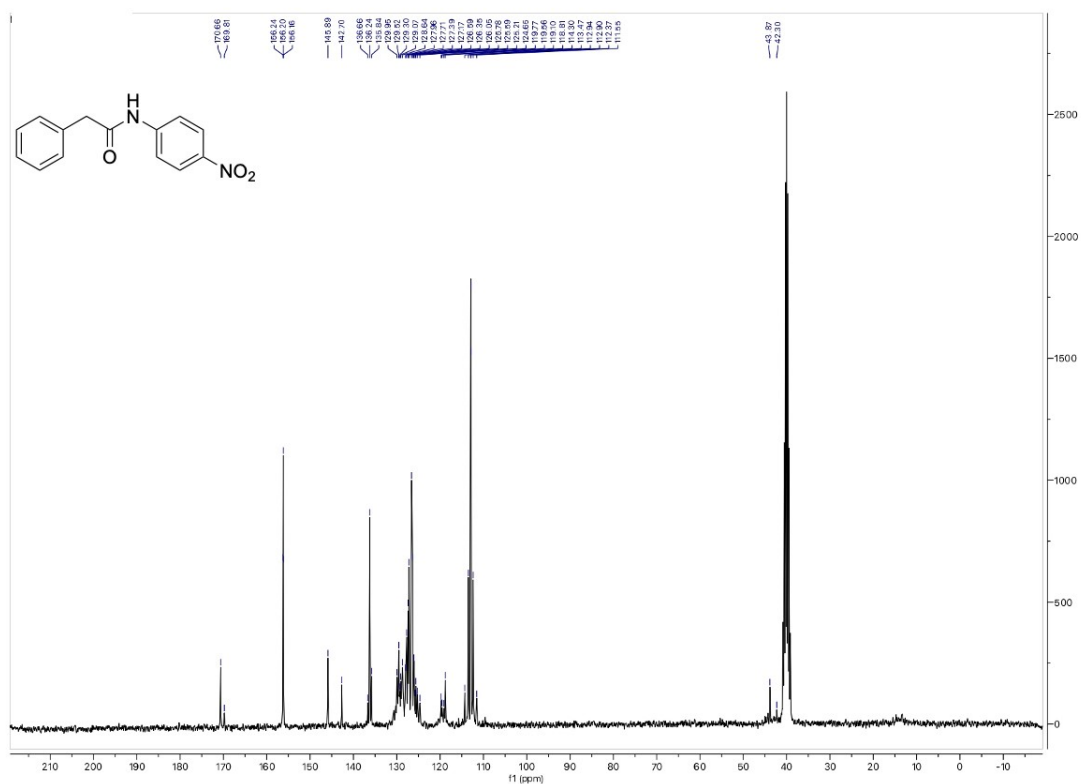

$^1\text{H}$  NMR: (300 MHz,  $\text{CDCl}_3$ ) of **3m**

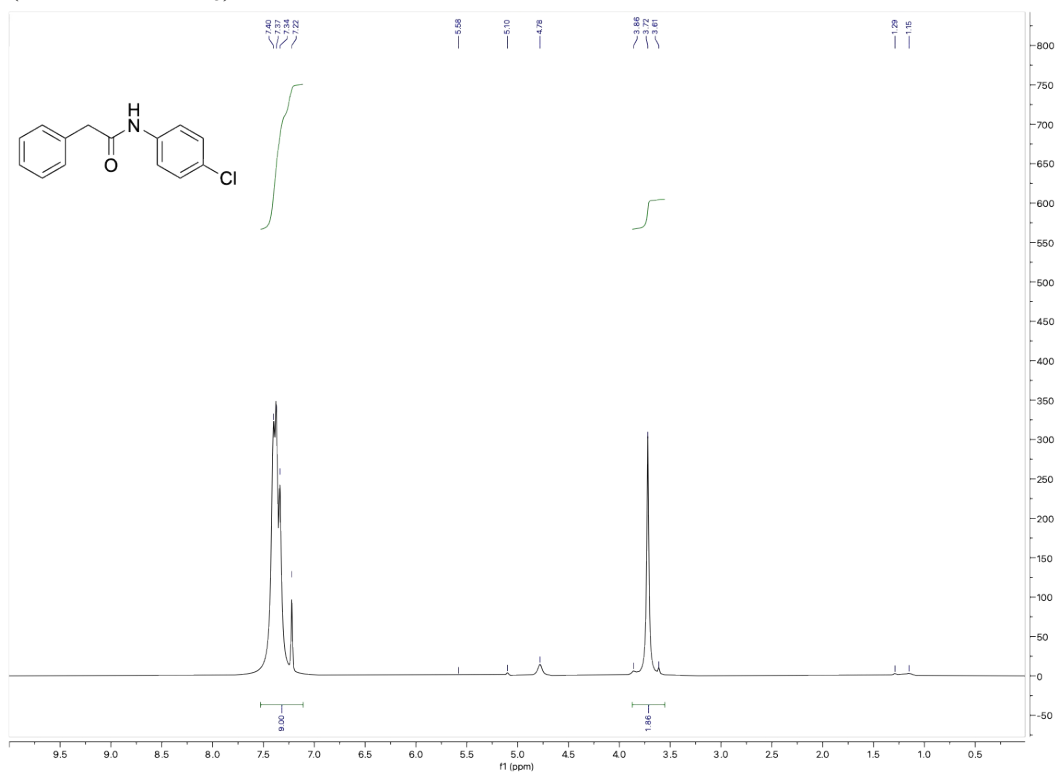

$^{13}\text{C}$  NMR: (75 MHz,  $\text{CDCl}_3$ ) of **3m**

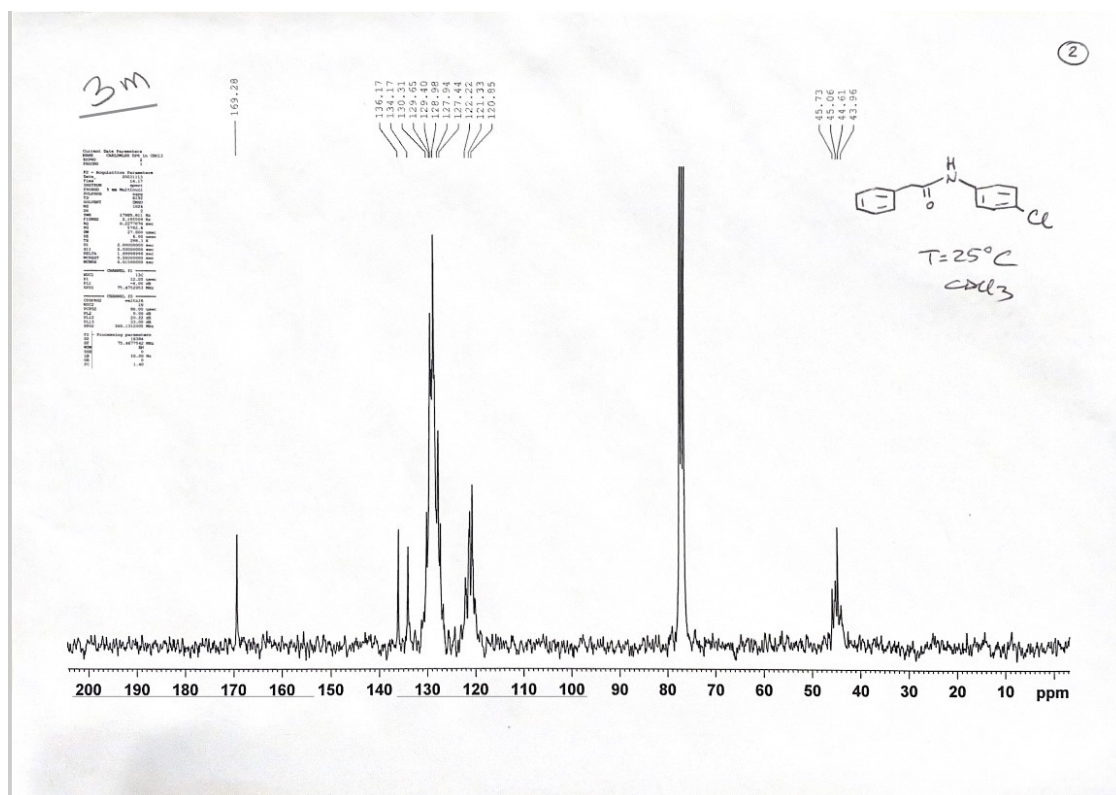



$^1\text{H}$  NMR: (300 MHz,  $\text{CDCl}_3$ ) of **3n**

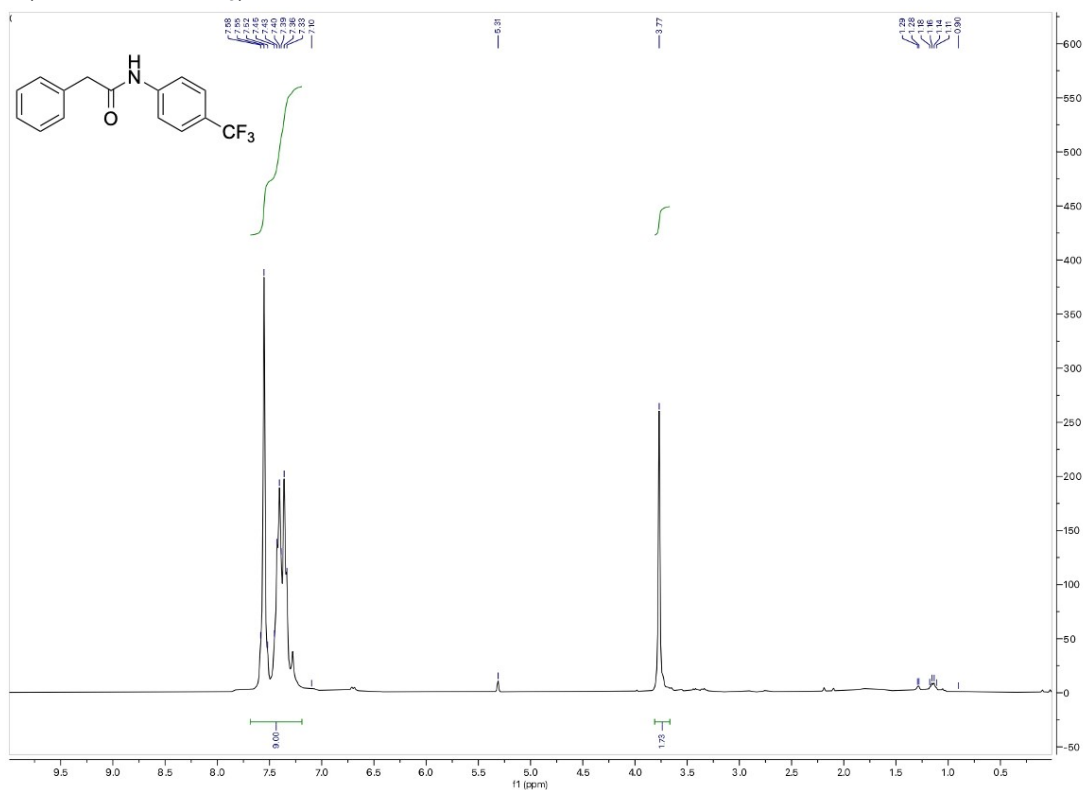

$^{13}\text{C}$  NMR: (75 MHz,  $\text{CDCl}_3$ ) of **3n**

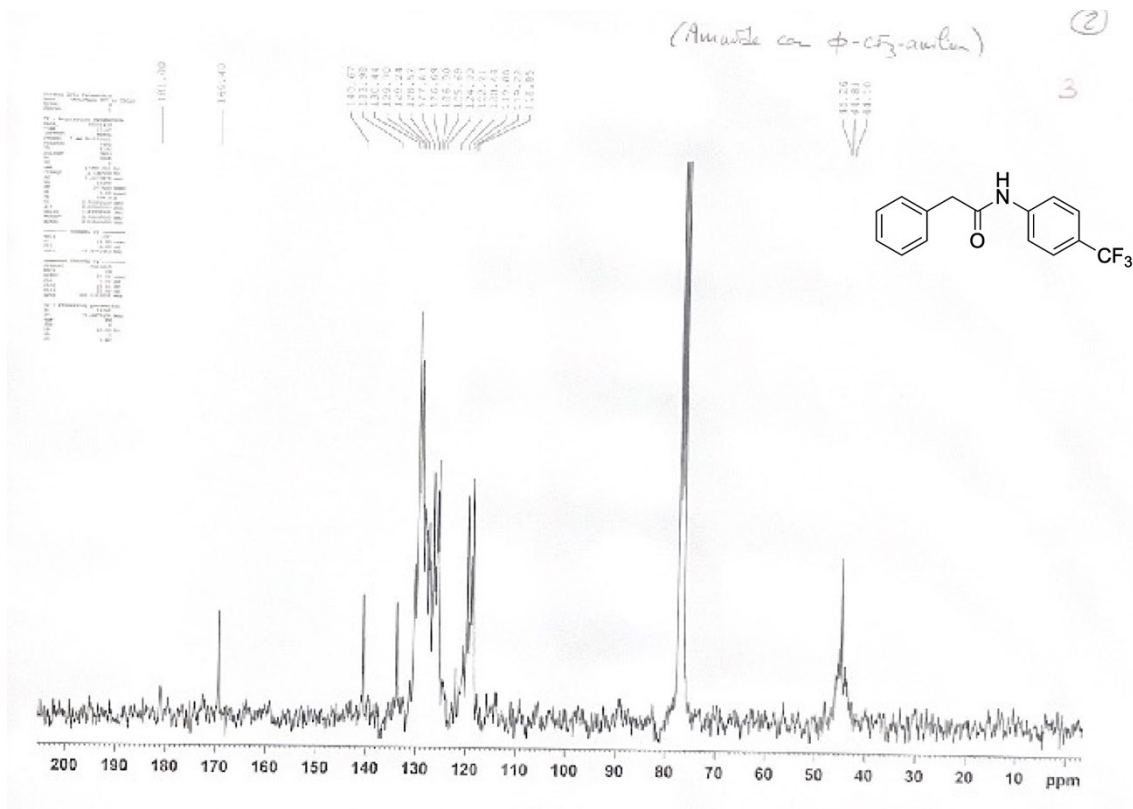

$^1\text{H}$  NMR: (300 MHz,  $\text{CDCl}_3$ ) of **3o** mixture of conformers (18:83) at 25°C

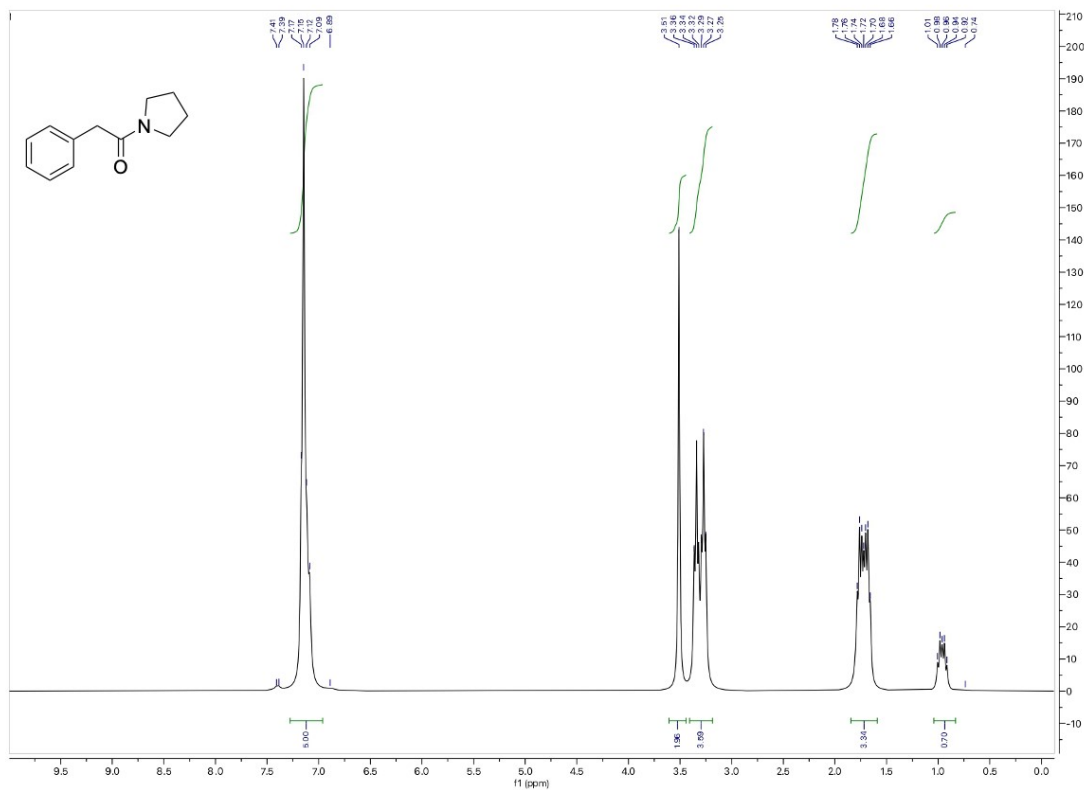

$^{13}\text{C}$  NMR: (75 MHz,  $\text{CDCl}_3$ ) of **3o** mixture of conformers at 25°C

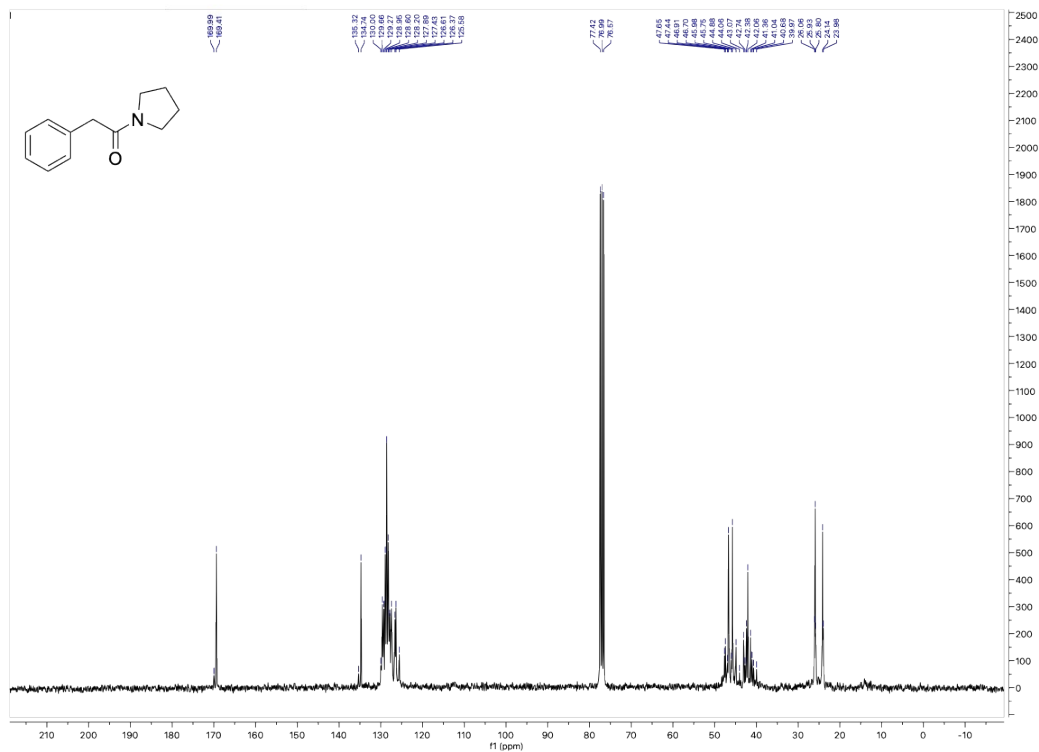

<sup>1</sup>H NMR: (300 MHz, CDCl<sub>3</sub>) of **3p**

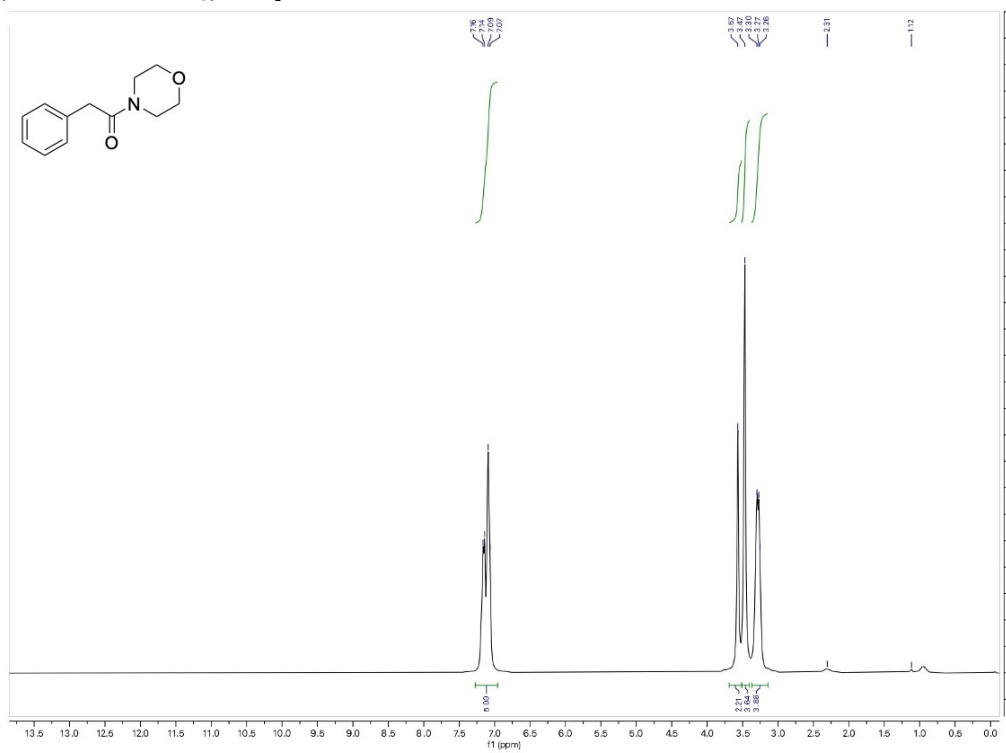

<sup>13</sup>C NMR: (75 MHz, CDCl<sub>3</sub>) of **3p**

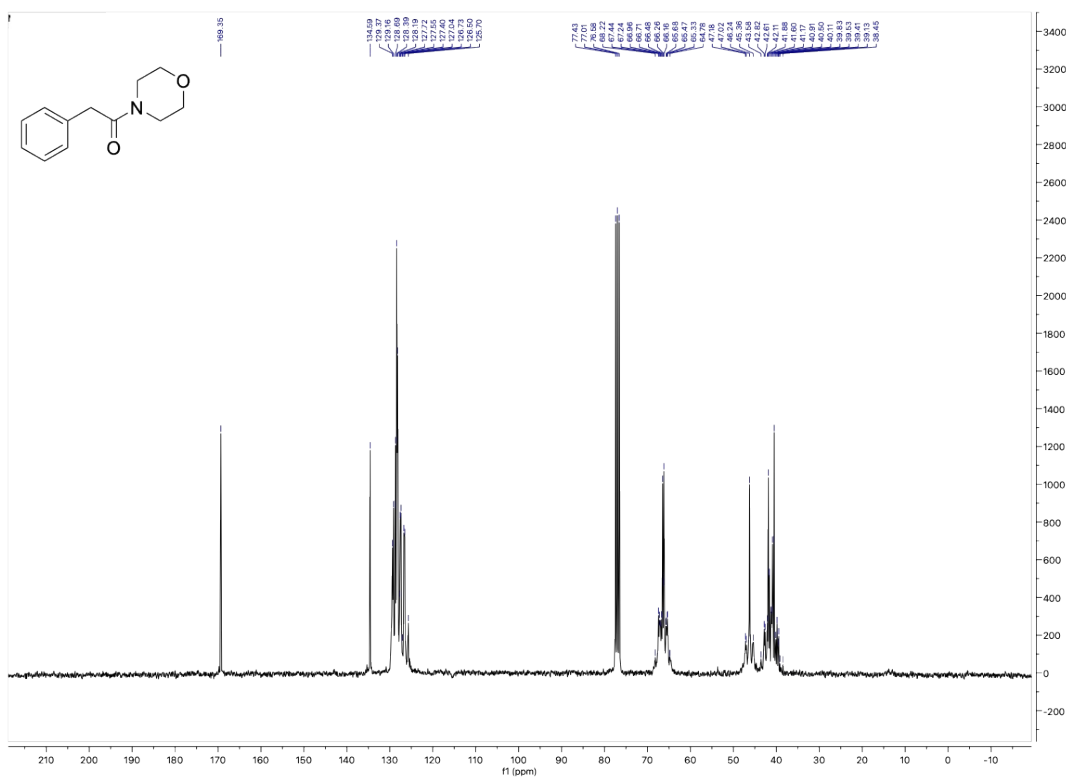

$^1\text{H}$  NMR: (300 MHz,  $\text{CDCl}_3$ ) of **4a**

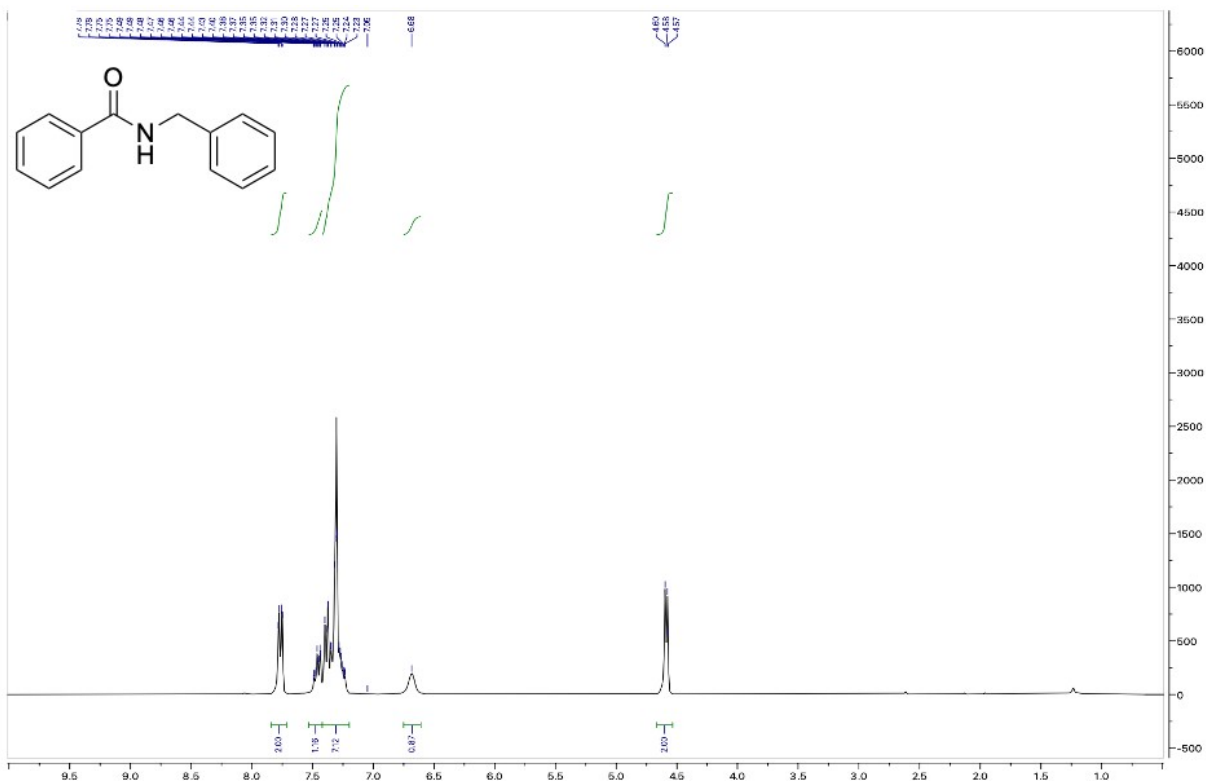

$^{13}\text{C}$  NMR: (75 MHz,  $\text{CDCl}_3$ ) of **4a**

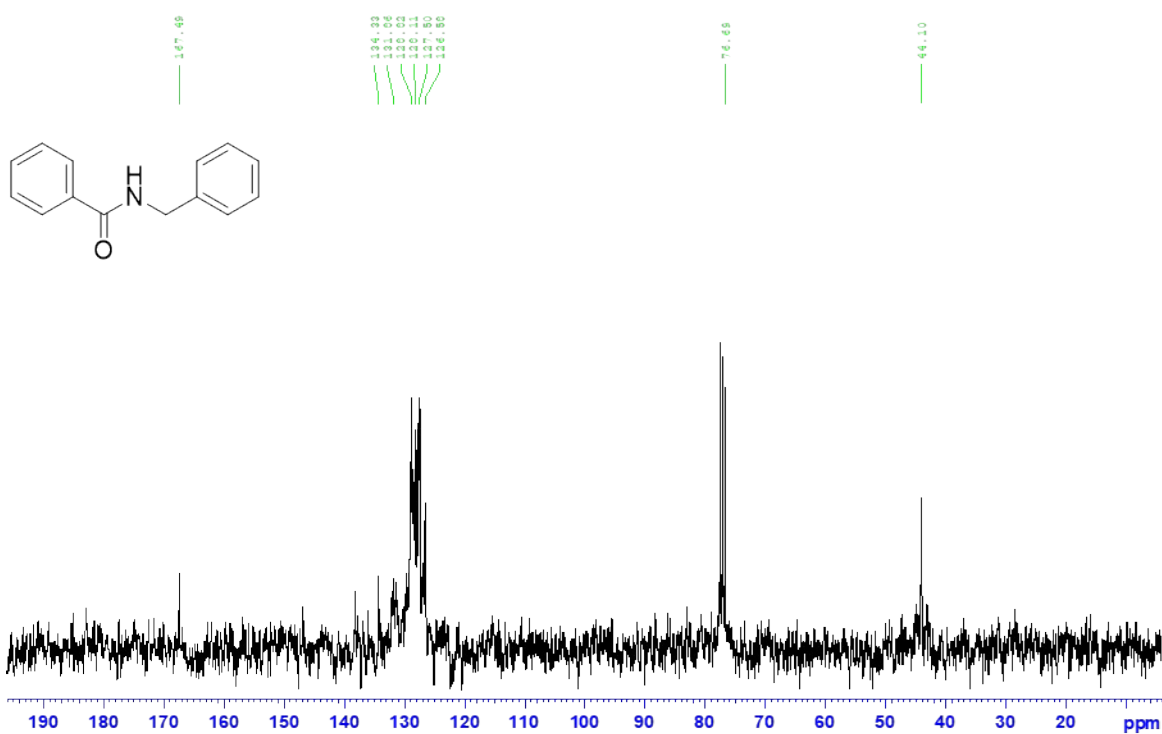

$^1\text{H}$  NMR: (300 MHz,  $\text{CDCl}_3$ ) of **4b**

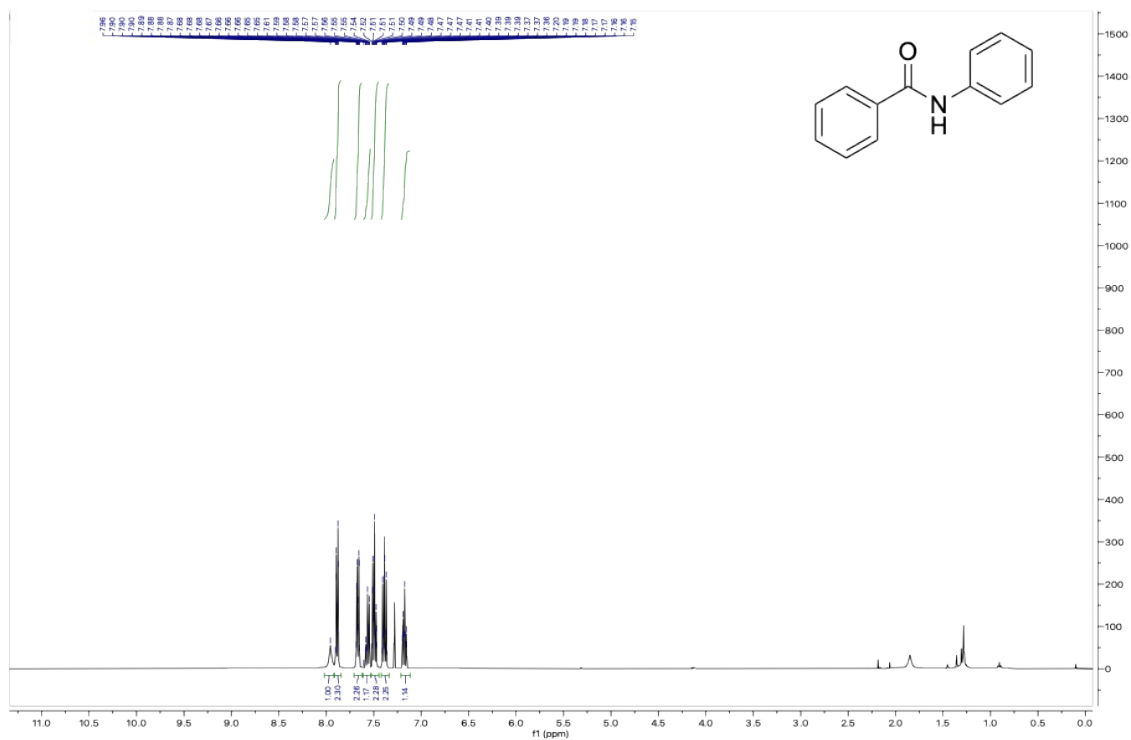

$^{13}\text{C}$  NMR: (75 MHz,  $\text{CDCl}_3$ ) of **4b**

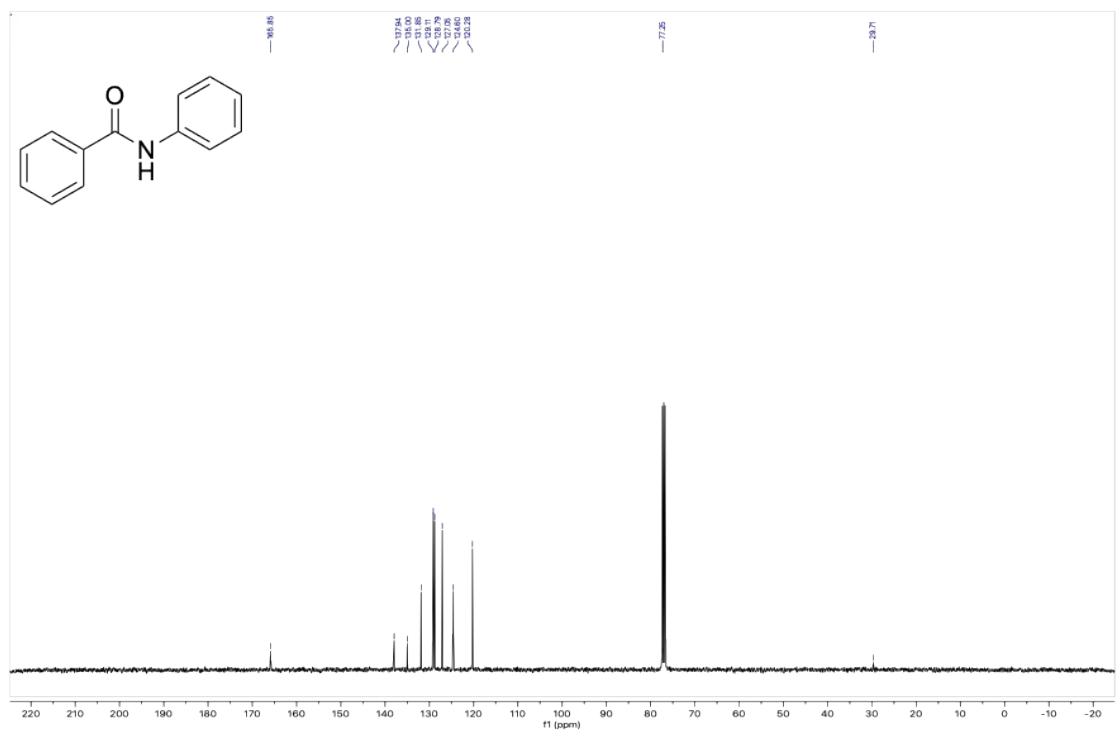

$^1\text{H}$  NMR: (300 MHz,  $\text{CDCl}_3$ ) of **4c**

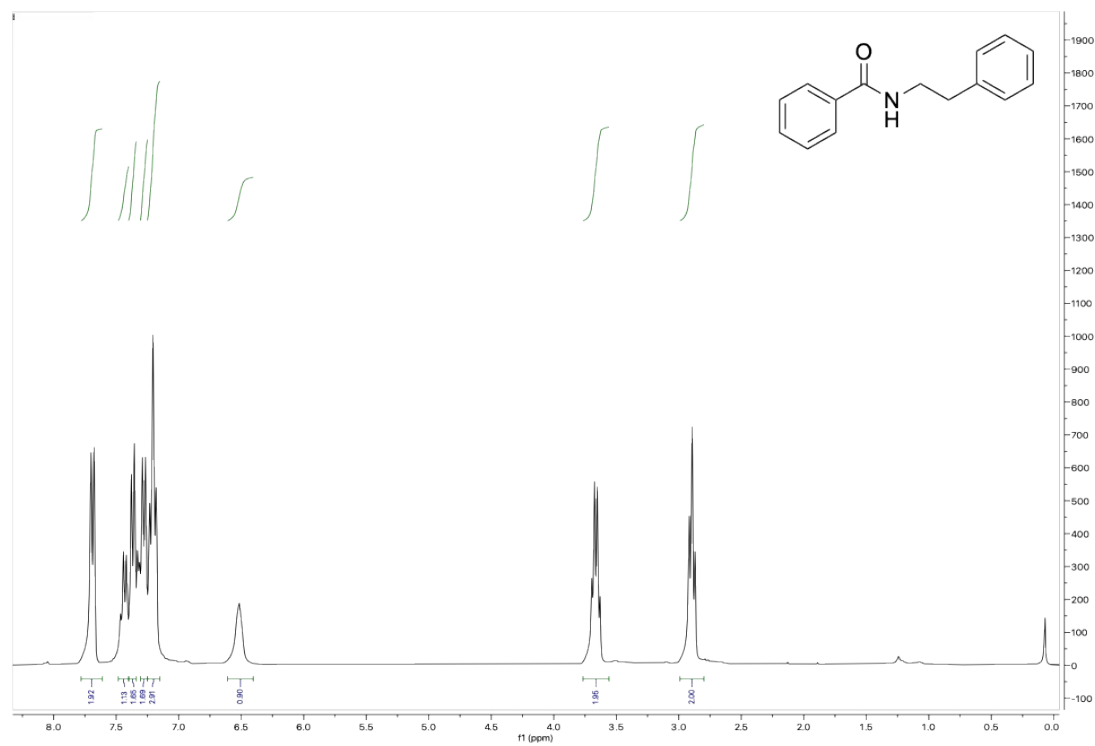

$^{13}\text{C}$  NMR: (75 MHz,  $\text{CDCl}_3$ ) of **4c**

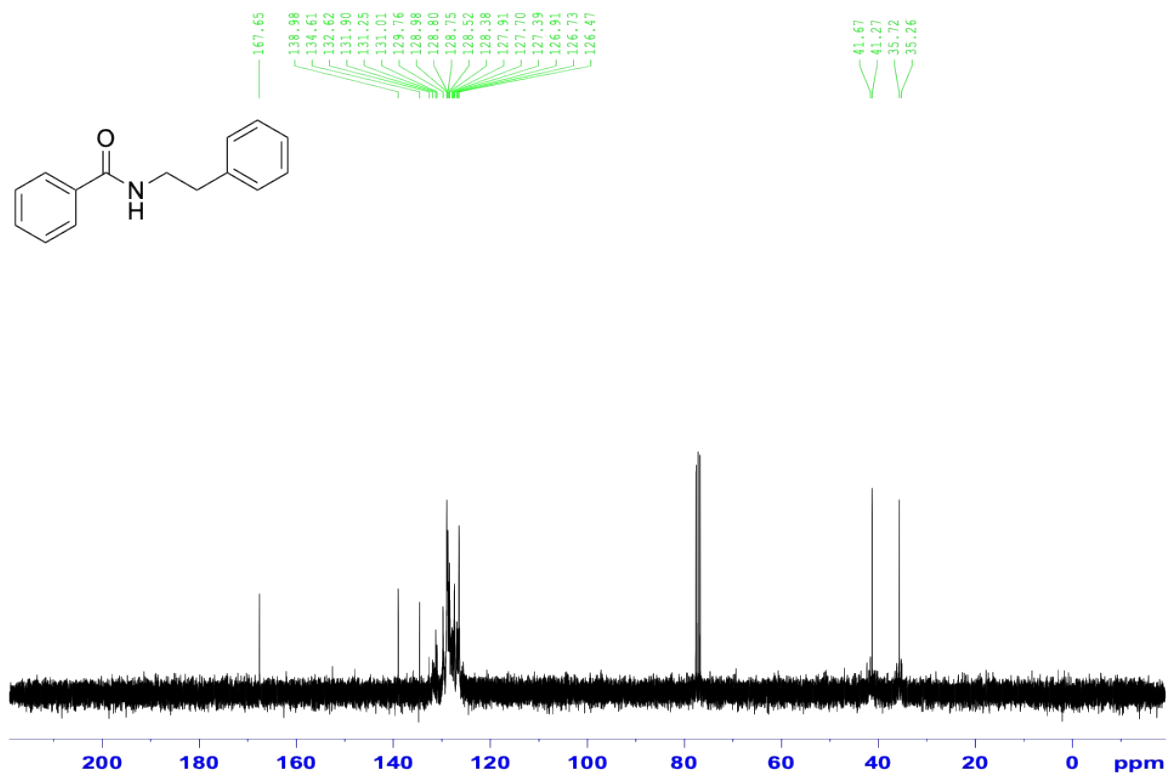

$^1\text{H}$  NMR: (300 MHz, DMSO-d<sub>6</sub>) of **4d**

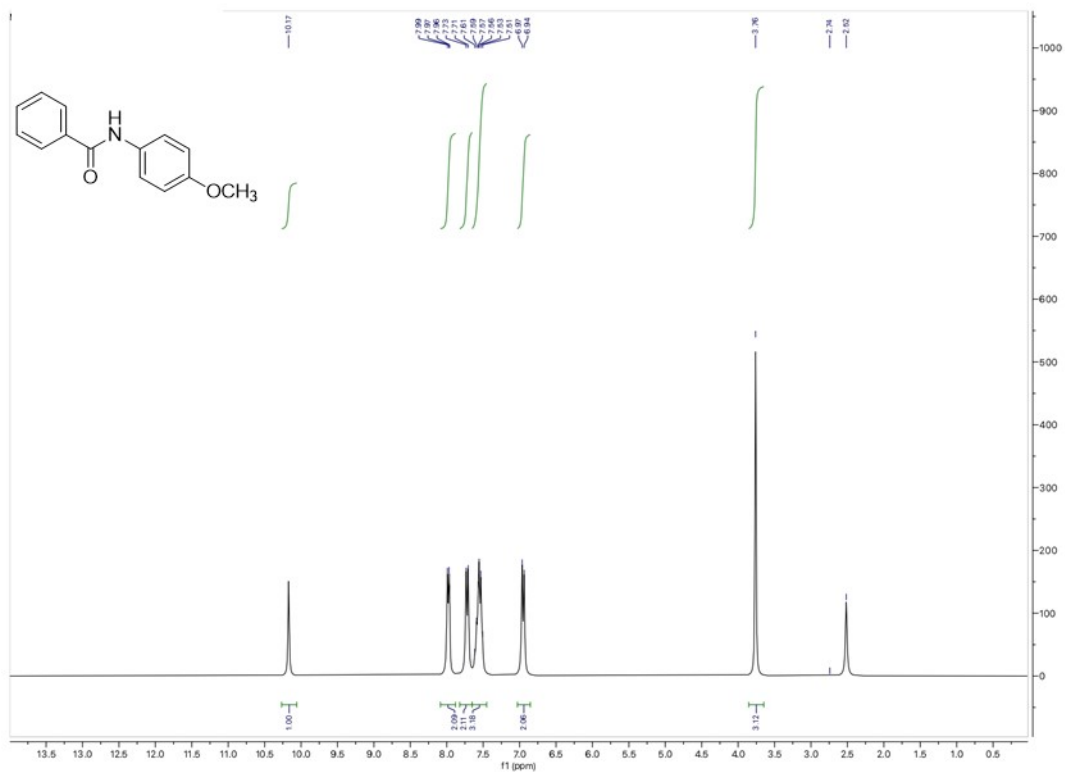

$^{13}\text{C}$  NMR: (75 MHz, DMSO-d<sub>6</sub>) of **4d**

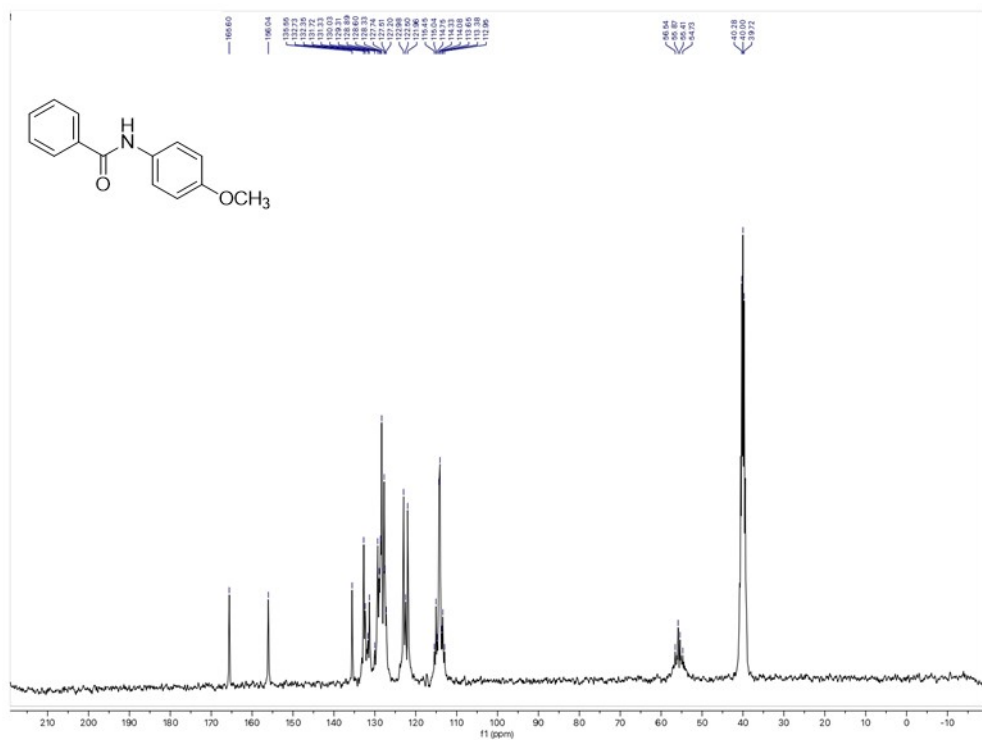

$^1\text{H}$  NMR: (300 MHz,  $\text{CDCl}_3$ ) of **4e**

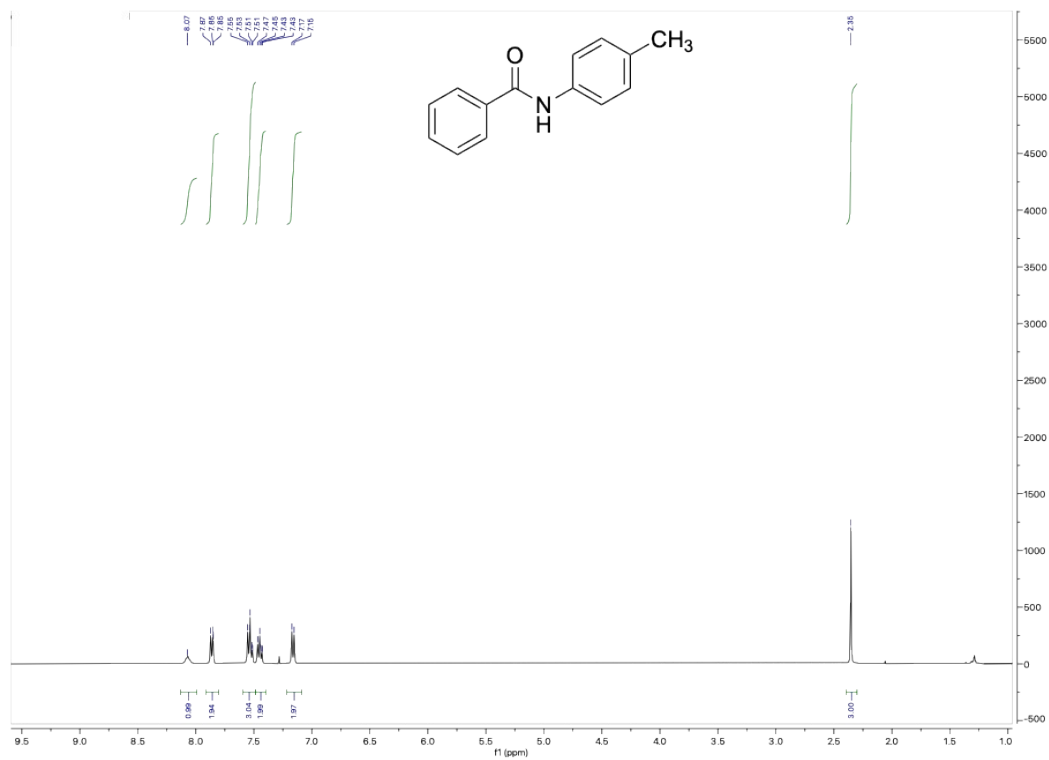

$^{13}\text{C}$  NMR: (75 MHz,  $\text{CDCl}_3$ ) of **4e**

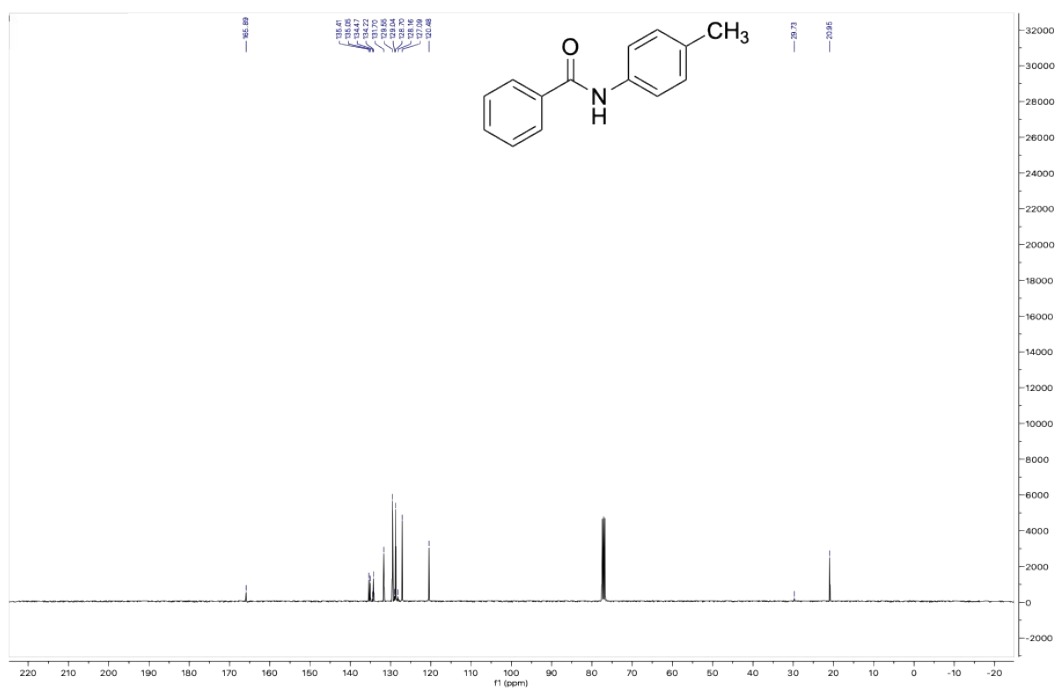



$^1\text{H}$  NMR: (300 MHz,  $\text{CDCl}_3$ ) of **4f**

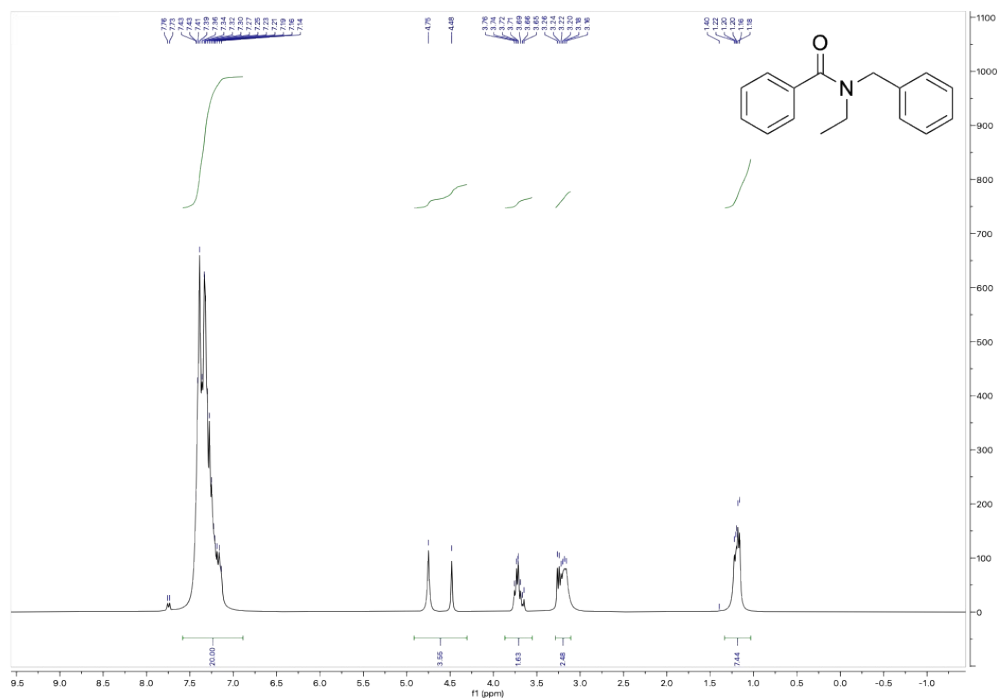

$^{13}\text{C}$  NMR: (75 MHz,  $\text{CDCl}_3$ ) of **4f**

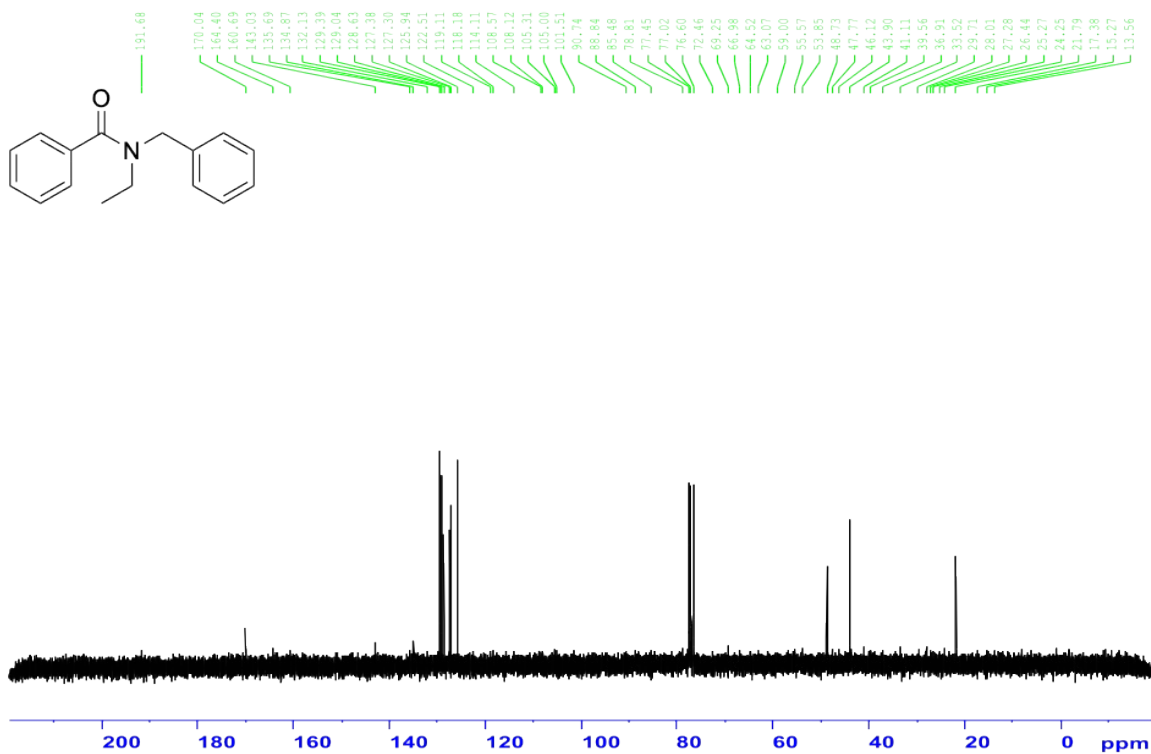

$^1\text{H}$  NMR: (300 MHz, DMSO- $d_6$ ) of **5a**

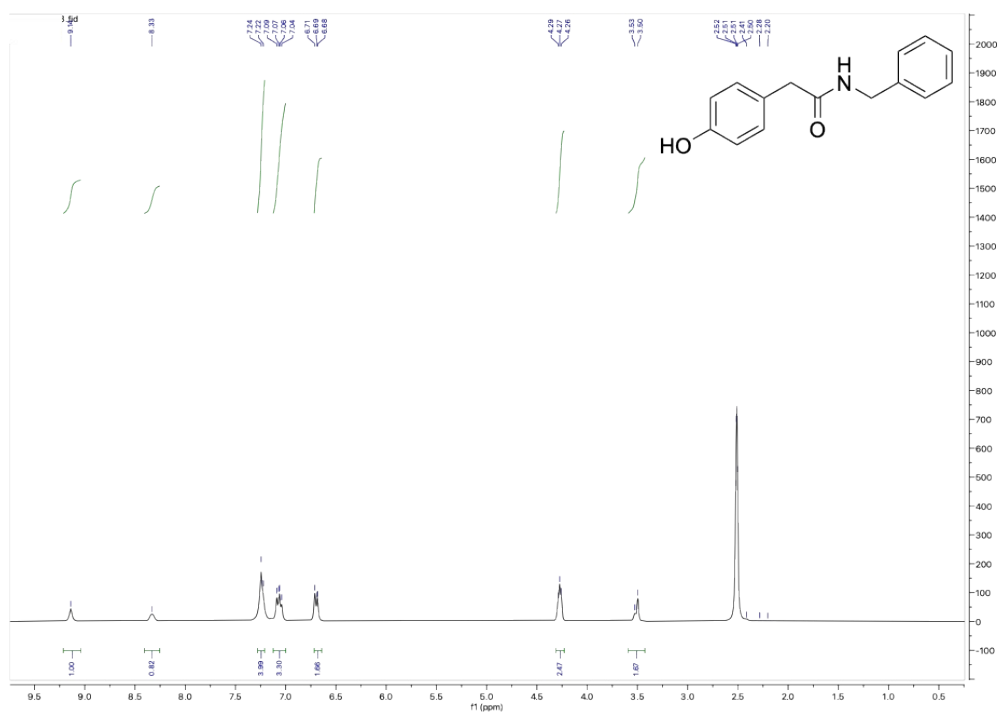

$^{13}\text{C}$  NMR: (75 MHz, DMSO- $D_6$ ) of **5a**

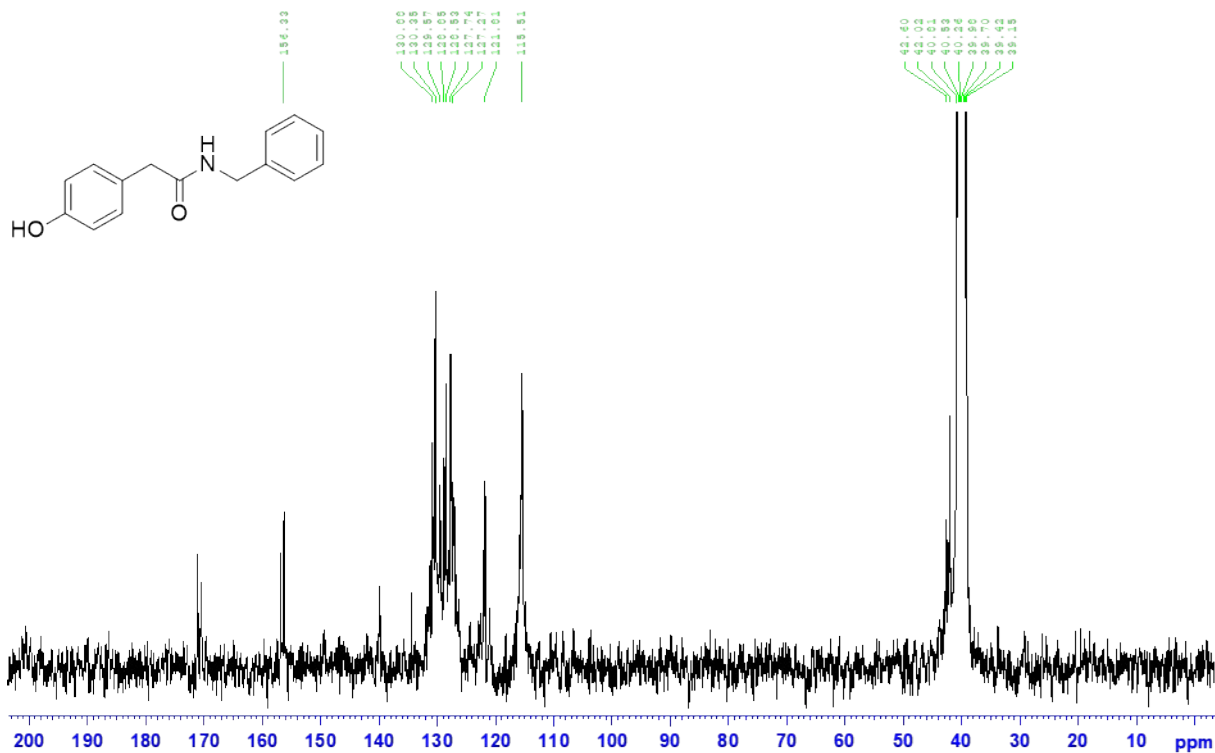

$^1\text{H}$  NMR: (300 MHz,  $\text{CDCl}_3$ ) of **5b**

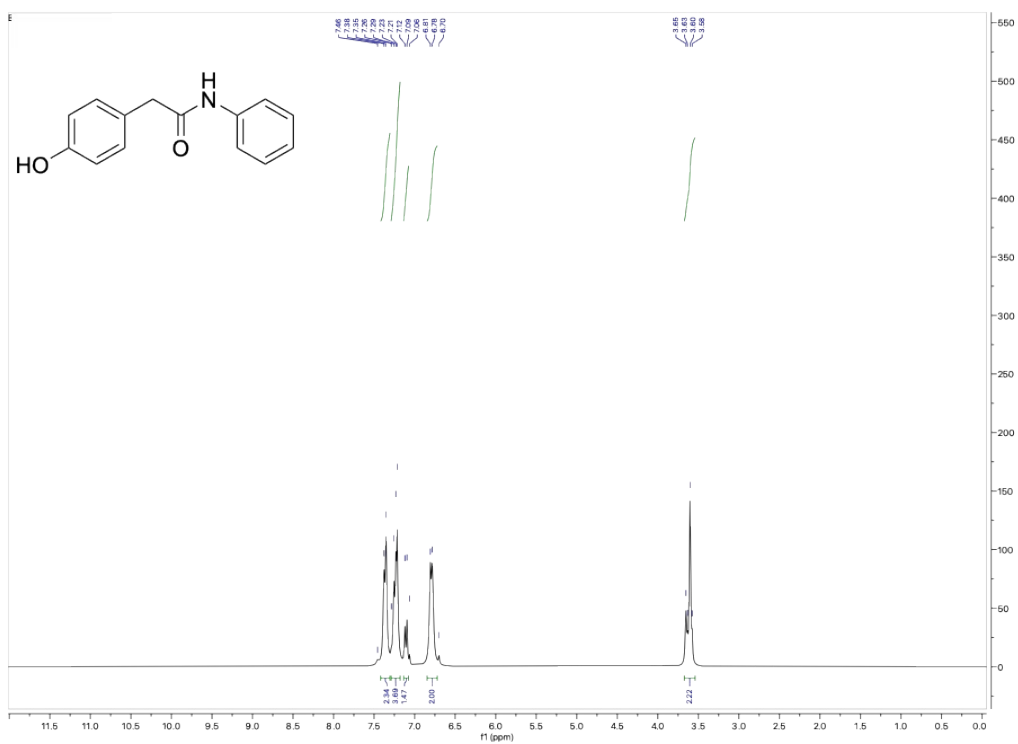

$^{13}\text{C}$  NMR: (75 MHz,  $\text{CDCl}_3$ ) of **5b**

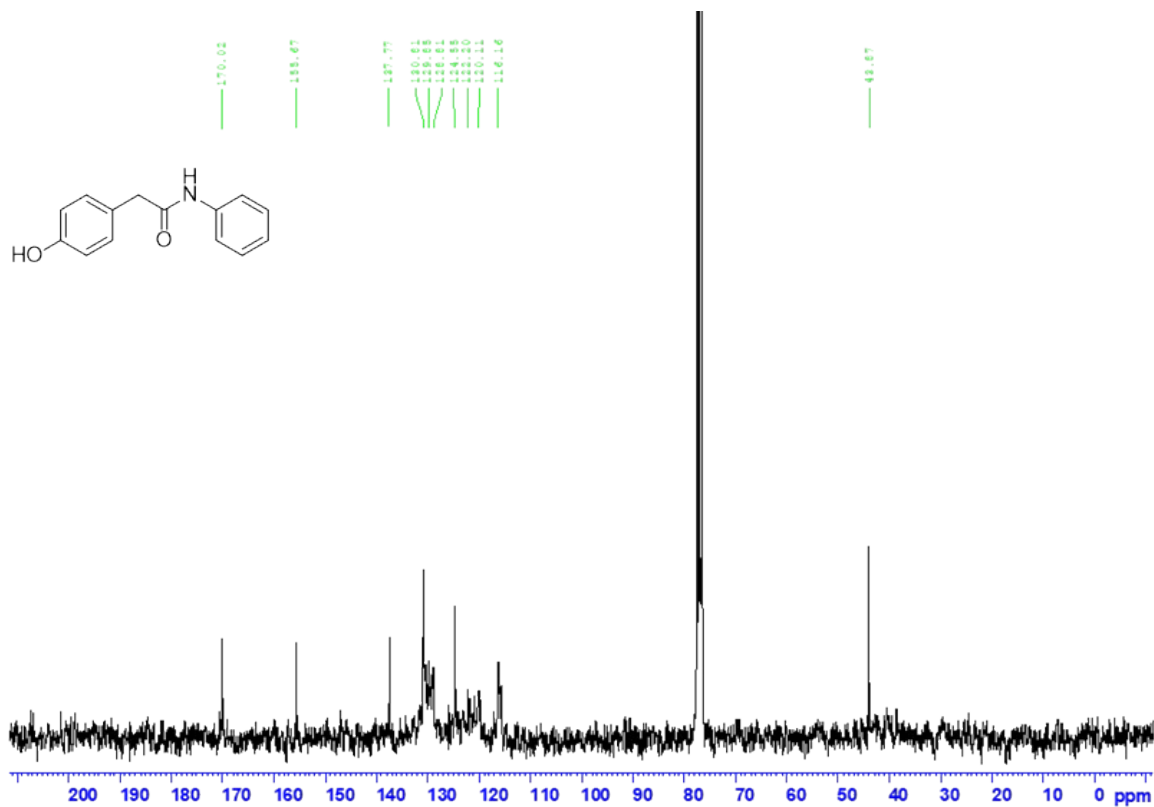

$^1\text{H}$  NMR: (300 MHz,  $\text{CDCl}_3$ ) of **5c**

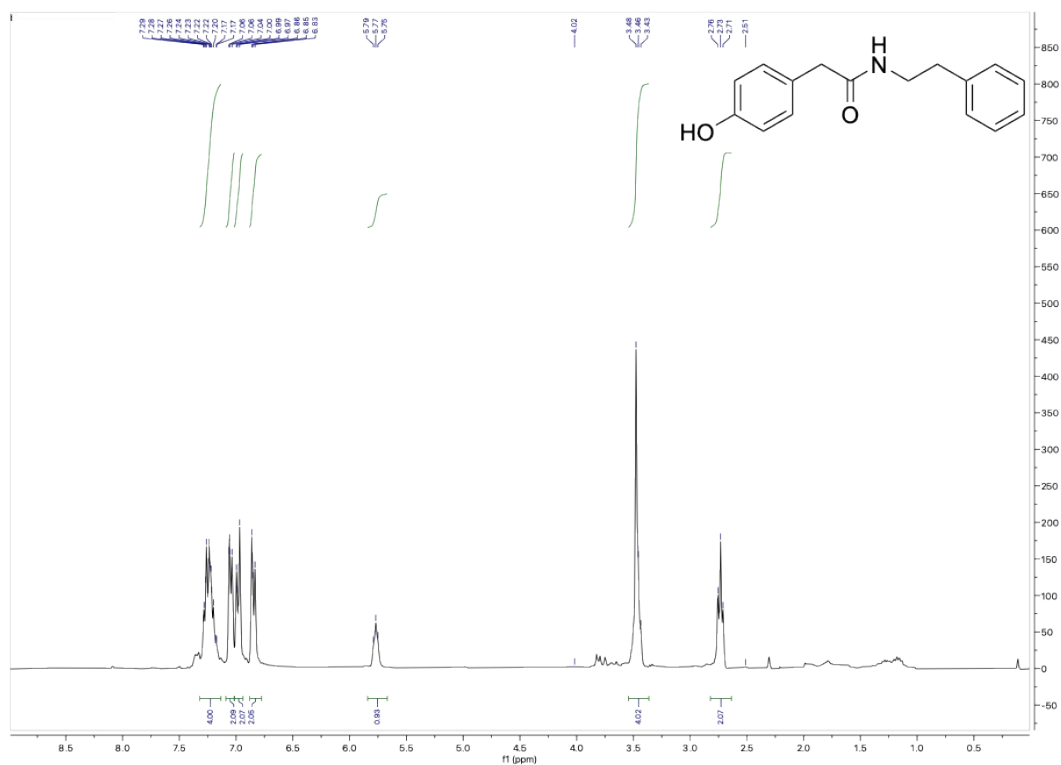

$^{13}\text{C}$  NMR: (75 MHz,  $\text{CDCl}_3$ ) of **5c**

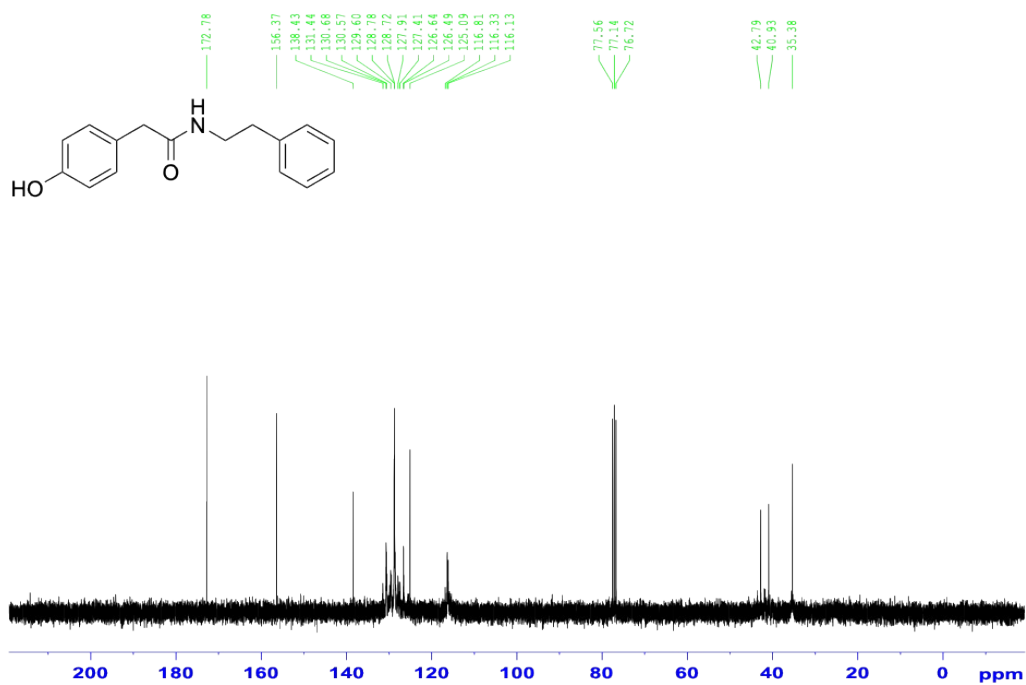

$^1\text{H}$  NMR: (300 MHz, DMSO- $d_6$ ) of **5d**

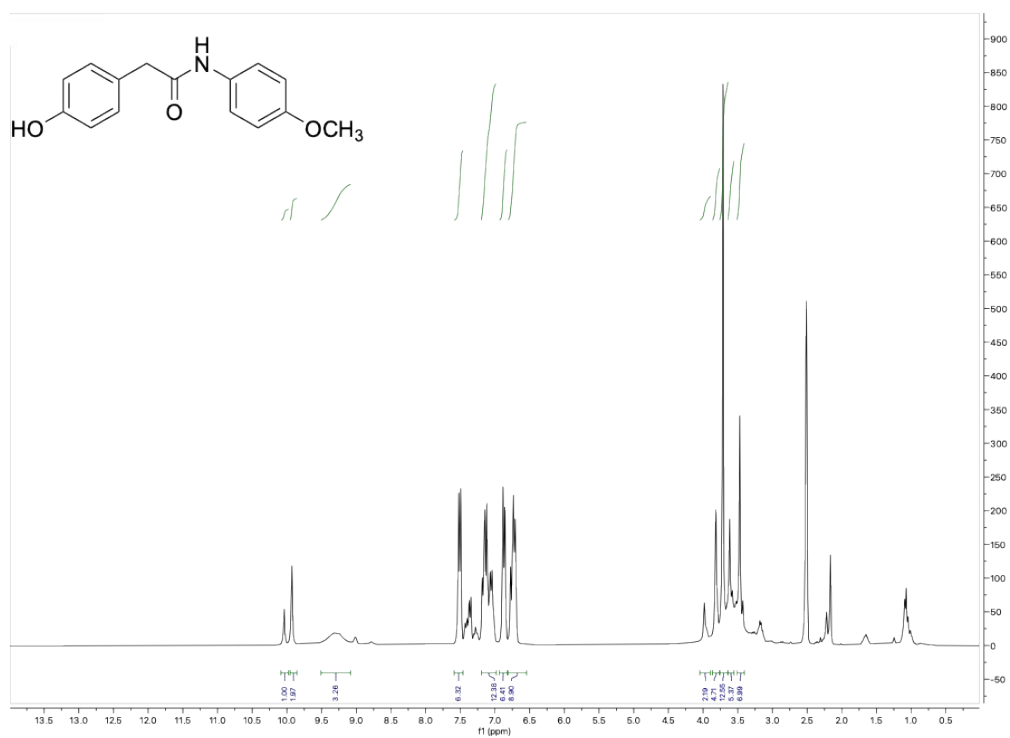

$^{13}\text{C}$  NMR: (75 MHz,  $\text{CDCl}_3$ ) of **5d**

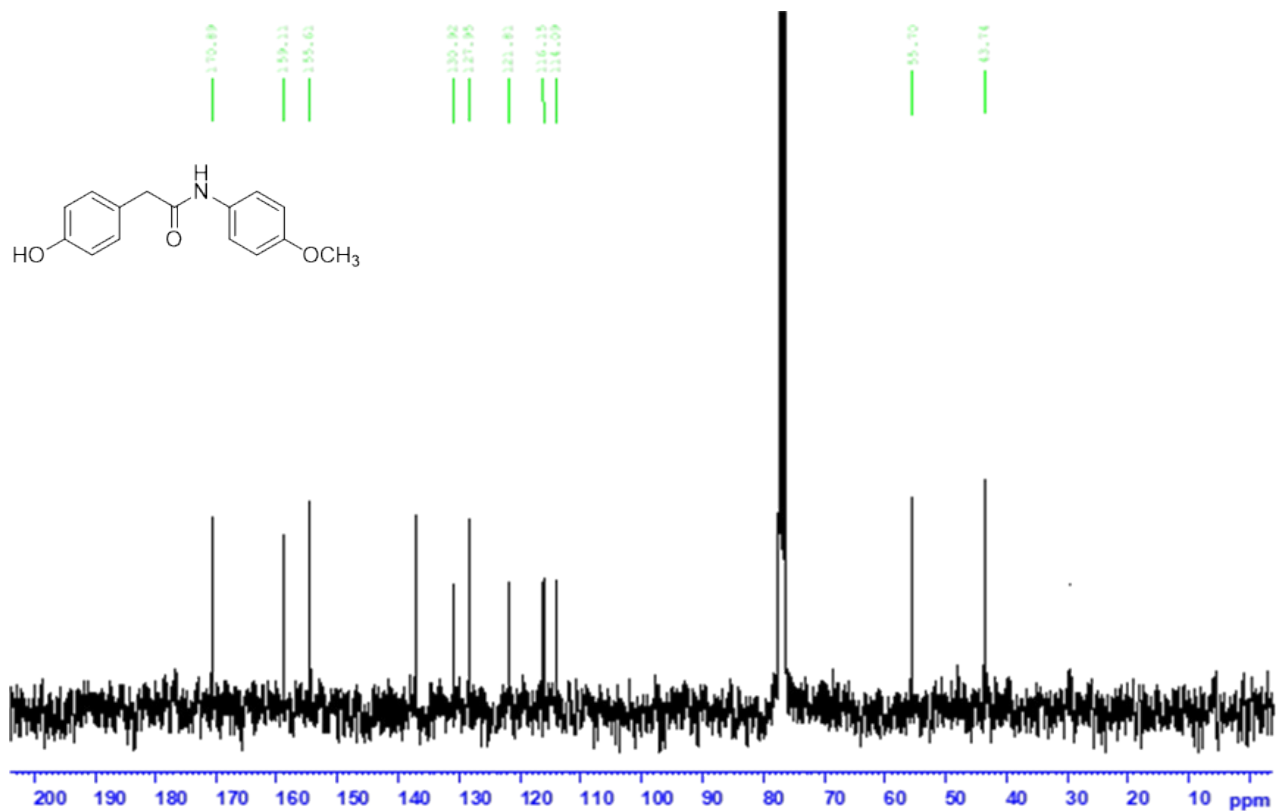

$^1\text{H}$  NMR: (300 MHz, DMSO- $d_6$ ) of **5e**

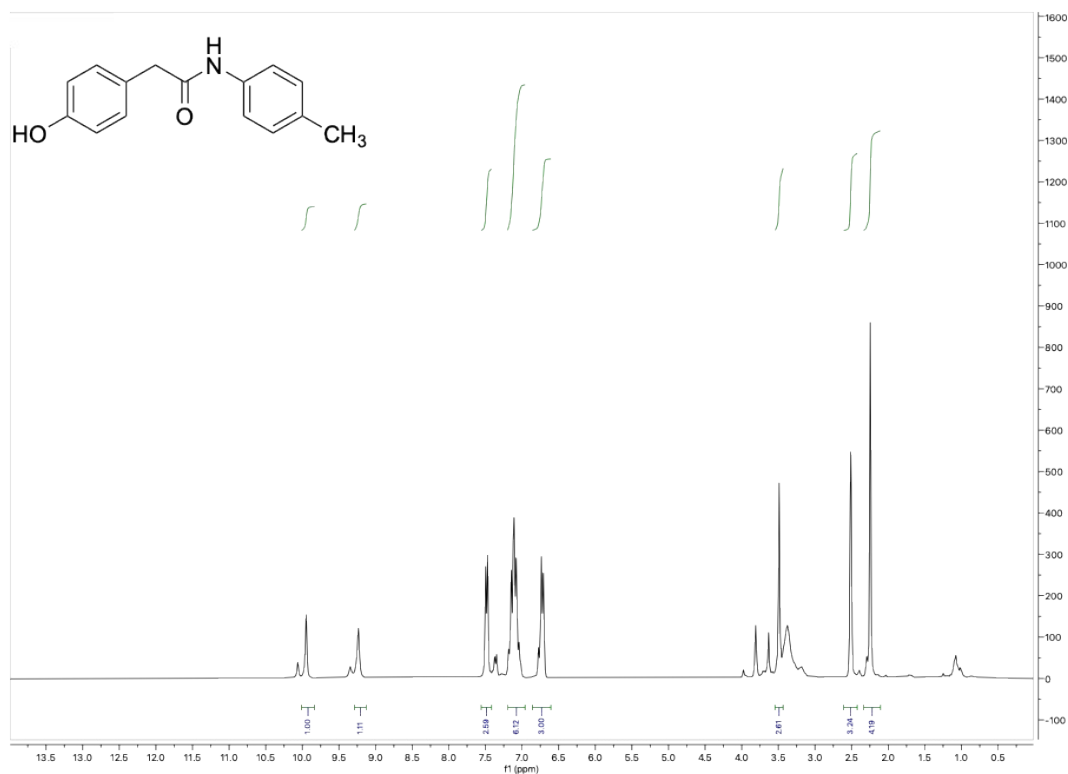

$^{13}\text{C}$  NMR: (75 MHz, DMSO- $d_6$ ) of **5e**

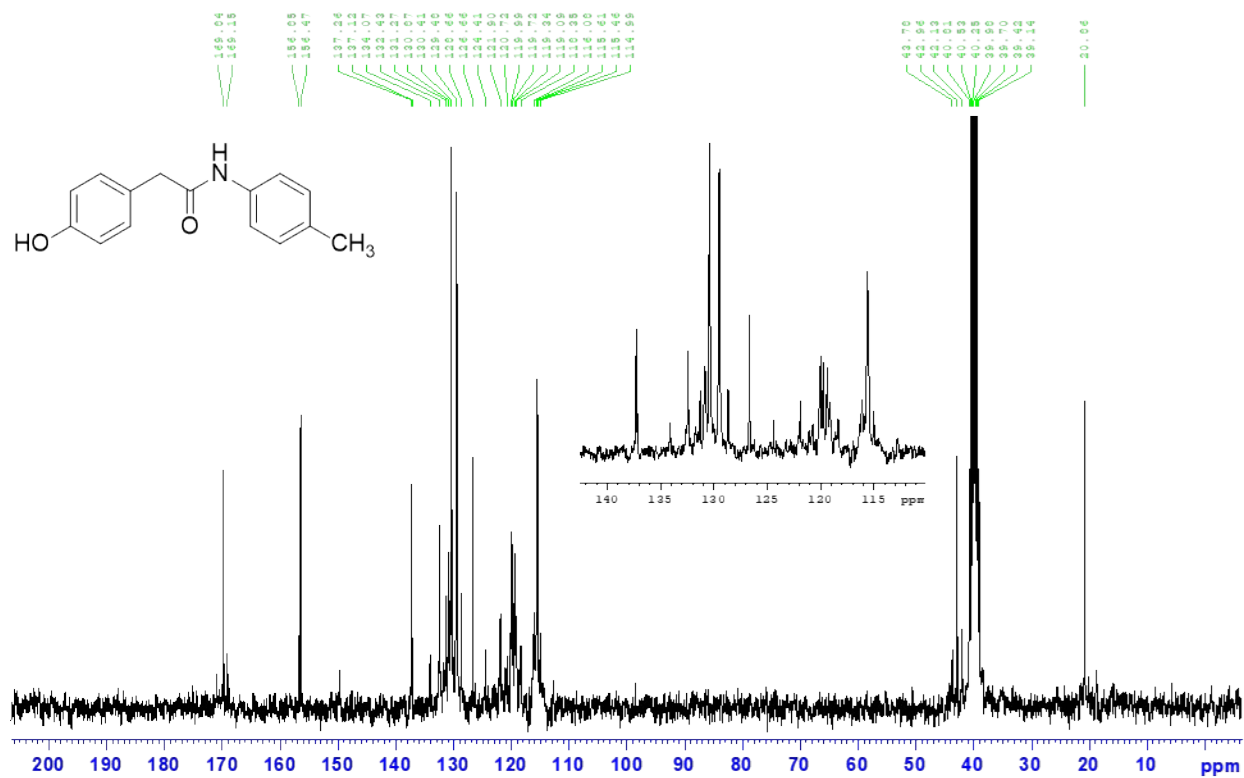

$^1\text{H}$  NMR: (300 MHz, DMSO- $d_6$ ) of **5f** – mixture of two rotamers

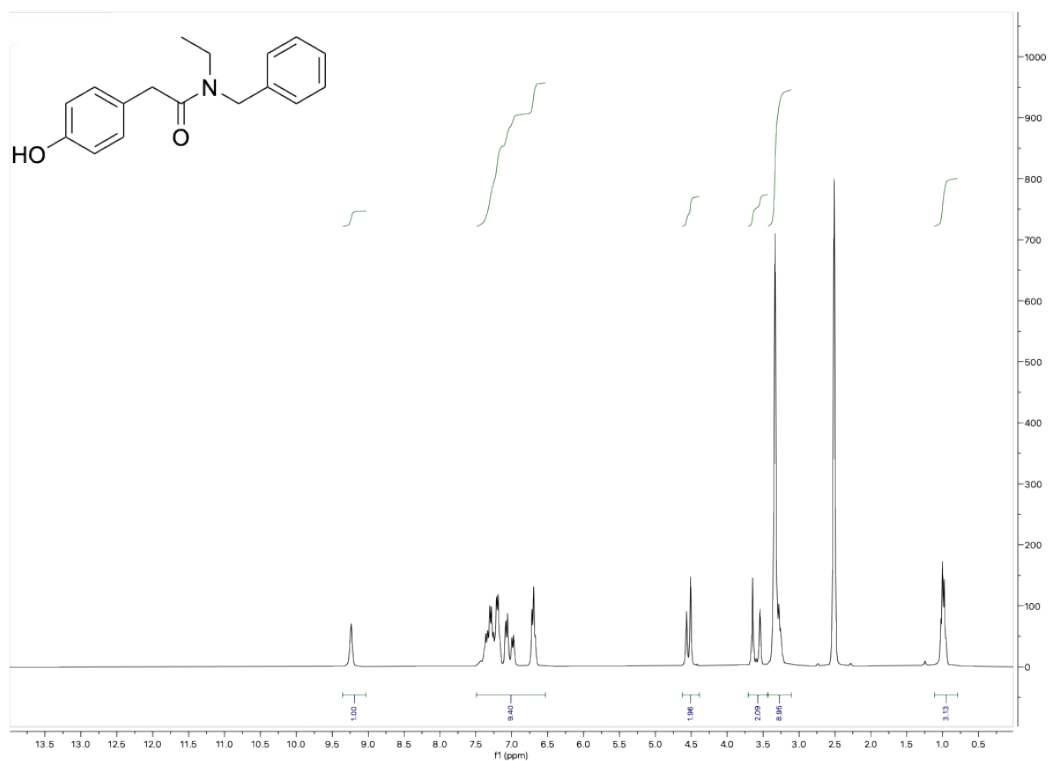

$^{13}\text{C}$  NMR: (75 MHz, DMSO- $d_6$ ) of **5f** mixture of two rotamers

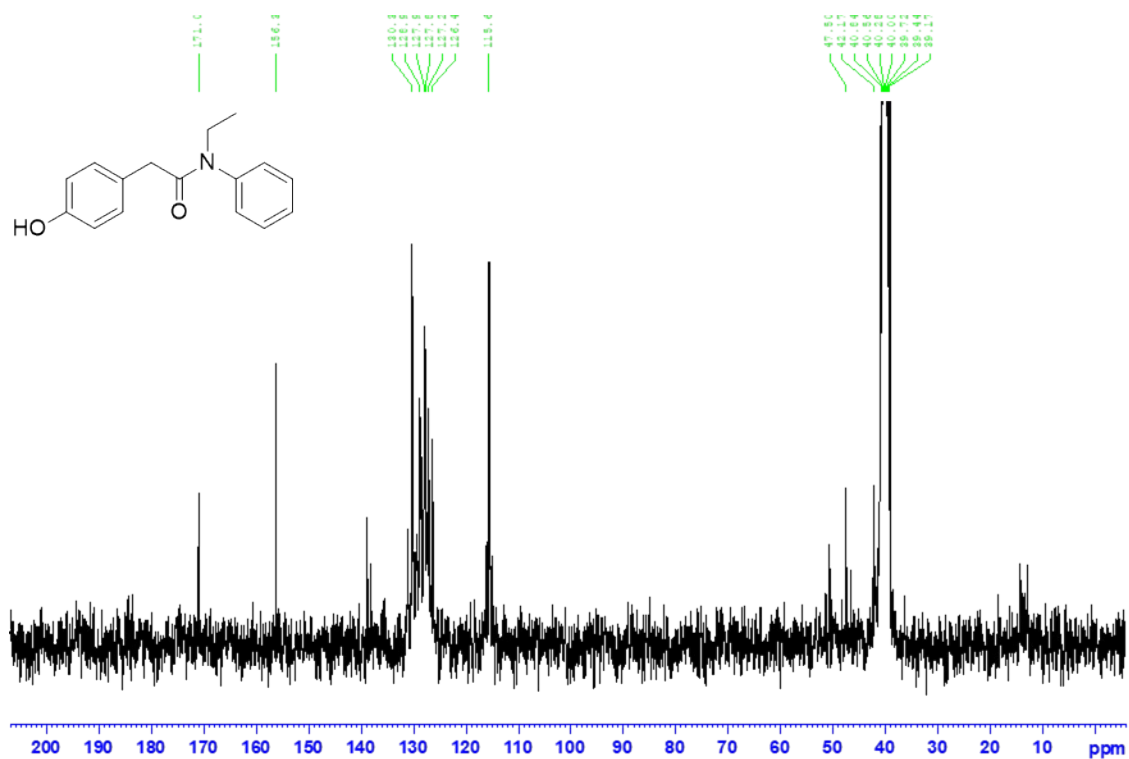

$^1\text{H}$  NMR: (300 MHz, DMSO- $d_6$ ) of **5g**

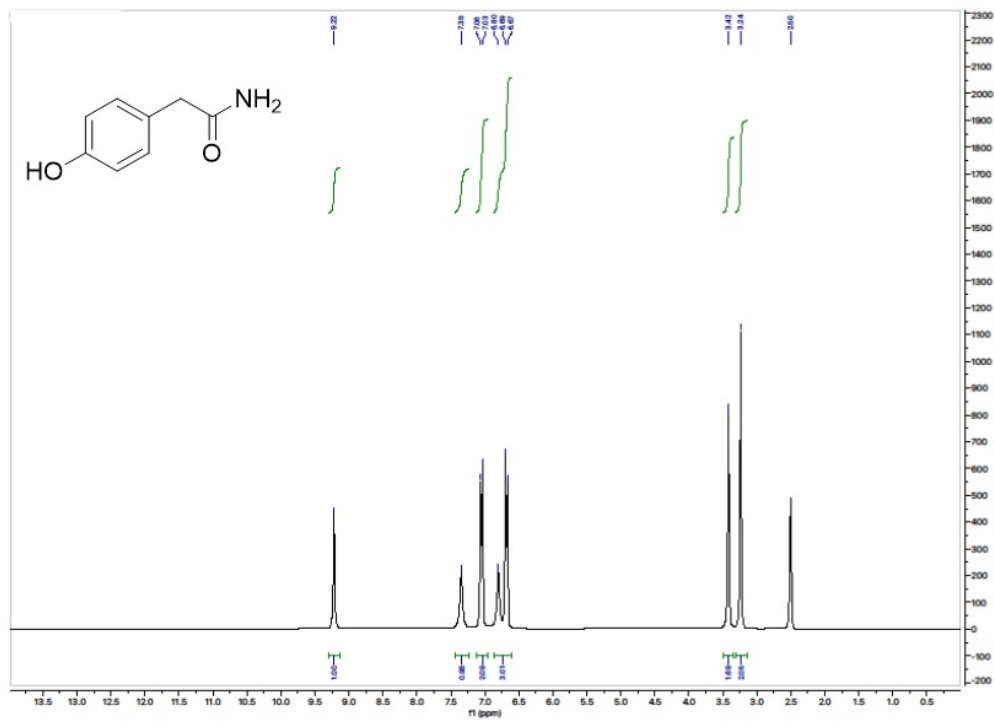

$^{13}\text{C}$  NMR: (75 MHz, DMSO- $d_6$ ) of **5g**

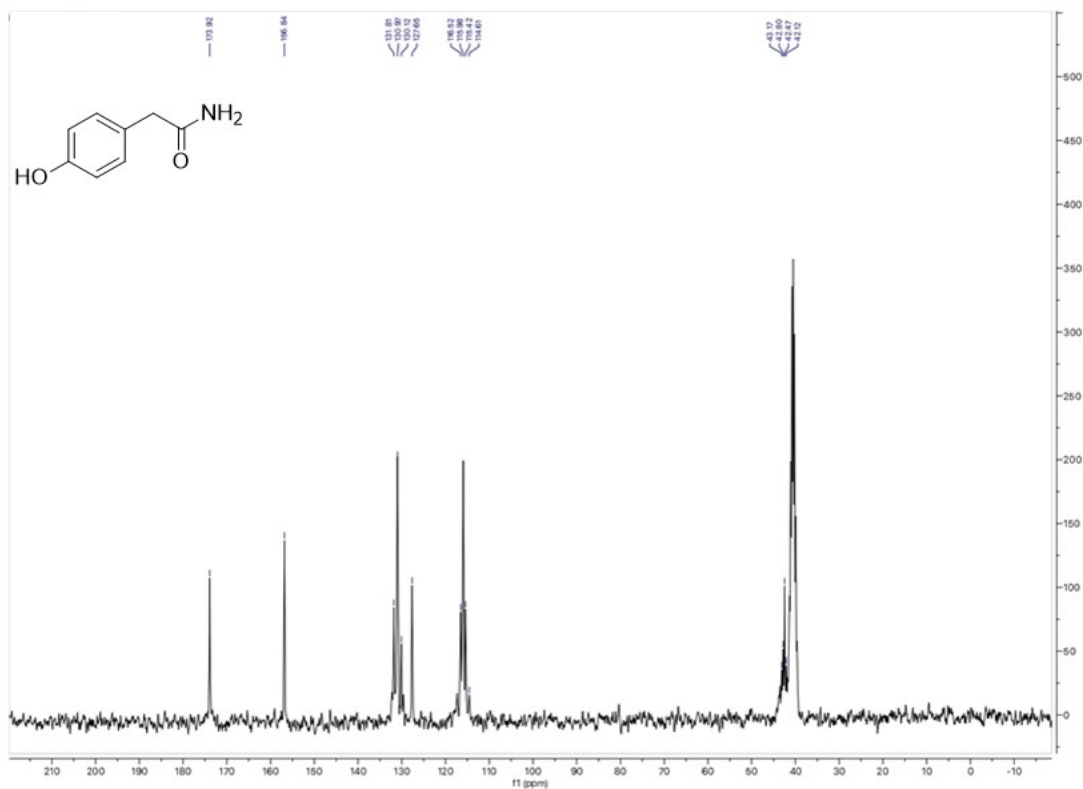



## 6. E-Factor and PMI calculation

| <b>PMI and E-factor of pilot reaction</b> |          |
|-------------------------------------------|----------|
| <b>Substrate</b>                          | mass (g) |
| <i>N-Phenethyl-2-phenylacetamide</i>      | 1,00     |
| <b>Reagents</b>                           | mass (g) |
| <i>Phenylacetic acid</i>                  | 1,11     |
| <i>ChCl</i>                               | 1,17     |
| <i>EDC</i>                                | 1,28     |
|                                           |          |
|                                           |          |
|                                           |          |
|                                           |          |
|                                           |          |
| <b>Organic Solvents</b>                   | mass (g) |
| <i>Ethyl acetate</i>                      | 30,00    |
|                                           |          |
|                                           |          |
|                                           |          |
|                                           |          |
|                                           |          |
|                                           |          |
|                                           |          |
|                                           |          |
| <b>Water or Aqueous Solutions</b>         | mass (g) |
| <i>water</i>                              | 11,00    |
|                                           |          |
|                                           |          |
|                                           |          |
|                                           |          |
|                                           |          |
|                                           |          |
|                                           |          |
| <b>Desired Product</b>                    | mass (g) |
| <i>AMIDE</i>                              | 1,89     |

| <b>Material Inputs</b> | mass (g) |
|------------------------|----------|
| Substrate              | 1,00     |
| Reagents               | 3,56     |
| Solvents               | 30,00    |

|                         |          |
|-------------------------|----------|
| Aqueous                 | 11,00    |
| Total                   | 45,56    |
| <b>Material Outputs</b> | mass (g) |
| Product                 | 1,89     |
| Waste                   | 43,67    |

|                 |           |
|-----------------|-----------|
| <b>PMI</b>      | <b>24</b> |
| <b>E-factor</b> | <b>23</b> |
